# Supplementary material for: Designing coordination polymers as multi-drug-self-delivery systems for tuberculosis and cancer therapy: in vitro viability and in vivo toxicity assessment
Source: Royal Society of Chemistry journal article supplement (doi:10.1039/d2bm00752e), 2022-01-01
Supplement: d2bm00752e2.pdf [file d2bm00752e2.pdf]

## Supporting Information

### **Designing coordination polymers as multi-drug-self-delivery system for tuberculosis and cancer therapy: in vitro viability and in vivo toxicity assessment**

Protap Biswas <sup>a</sup>, Hemanta Kumar Datta <sup>a</sup>, and Parthasarathi Dastidar\*<sup>a</sup>

<sup>a</sup> School of Chemical Sciences, Indian Association for the Cultivation of Science, 2A & 2B Raja S. C. Mullick Road, Kolkata-700032, West Bengal., India.

Email: [ocpd@iacs.res.in](mailto:ocpd@iacs.res.in)

## Table of Contents

## Page No

|     |                                                                                                       |       |
|-----|-------------------------------------------------------------------------------------------------------|-------|
| 1.  | Crystallographic table .....                                                                          | 3     |
| 2.  | IR data of Coordination polymers (Fig. S1-S5) .....                                                   | 4-5   |
| 3.  | Oak Ridge Thermal Ellipsoid Plot (ORTEP) and H bond Table of crystals (Fig. S6-S10, Table S1-S6)..... | 6-8   |
| 4.  | Single Crystal Structure of the crystals S11-S17.....                                                 | 9-11  |
| 5.  | Powder X-ray Diffraction data (Fig. S16).....                                                         | 11    |
| 6.  | Dynamic Light Scattering and Zeta Potential measurements (Fig. S17,S18).....                          | 12    |
| 7.  | Anti-Bacterial Zone assays (Fig. S19-S22).....                                                        | 13-15 |
| 8.  | Turbidity and Resazurin assay (Fig. S23-S26).....                                                     | 15-17 |
| 9.  | Flow cytometry data of M. tb (Fig.S27-S28).....                                                       | 18-19 |
| 10. | Cytotoxicity measurements by MTT Assays (Fig. S29).....                                               | 19    |
| 11. | Infection experiment data (Fig. S30).....                                                             | 20    |
| 12. | Cell Migration data (Fig. S31).....                                                                   | 20    |
| 13. | <i>In vivo</i> Experimental data (Fig. S32-S35, Table S7).....                                        | 24-23 |
| 14. | Bulk PXRD, TGA and temperature variant PXRD data <b>IZDIC</b> (Fig. S36-S38)...                       | 24-25 |
| 15. | <i>In vivo</i> Histopathological data (Fig. S39).....                                                 | 25    |

**1. TableS1: Crystallographic table**

| Identification code                                          | <b>IZIBU</b>                                                                 | <b>IZFEN</b>                                                                        | <b>IZNAP</b>                                                                 | <b>IZDIC</b>                                                                     | <b>IZMEF</b>                                                                    |
|--------------------------------------------------------------|------------------------------------------------------------------------------|-------------------------------------------------------------------------------------|------------------------------------------------------------------------------|----------------------------------------------------------------------------------|---------------------------------------------------------------------------------|
| CCDC No                                                      | 2116236                                                                      | 2116240                                                                             | 2116237                                                                      | 2116241                                                                          | 2116238                                                                         |
| Crystalizing Solvent                                         | Water:MeOH:EtOH (1:1:1)                                                      | Water:MeOH:EtOH (1:1:1)                                                             | Water:MeOH:EtOH (1:1:1)                                                      | Water:MeOH:EtOH (1:1:1)                                                          | Water:MeOH:EtOH (1:1:1)                                                         |
| Empirical formula                                            | C <sub>32</sub> H <sub>41</sub> N <sub>3</sub> O <sub>5</sub> Zn             | C <sub>18</sub> H <sub>15</sub> N <sub>1.5</sub> O <sub>3.5</sub> Zn <sub>0.5</sub> | C <sub>34</sub> H <sub>35</sub> N <sub>3</sub> O <sub>8</sub> Zn             | C <sub>34</sub> H <sub>27</sub> Cl <sub>4</sub> N <sub>5</sub> O <sub>5</sub> Zn | C <sub>53</sub> H <sub>50</sub> N <sub>6</sub> O <sub>7.5</sub> Zn <sub>2</sub> |
| Formula weight                                               | 613.05                                                                       | 341.00                                                                              | 679.02                                                                       | 792.77                                                                           | 1021.73                                                                         |
| Temperature/K                                                | 296.15                                                                       | 150                                                                                 | 298                                                                          | 293                                                                              | 108.68                                                                          |
| Crystal system                                               | monoclinic                                                                   | monoclinic                                                                          | orthorhombic                                                                 | orthorhombic                                                                     | monoclinic                                                                      |
| Space group                                                  | <i>P</i> 2 <sub>1</sub> / <i>c</i>                                           | <i>C</i> 2/ <i>c</i>                                                                | <i>P</i> 2 <sub>1</sub> 2 <sub>1</sub>                                       | <i>P</i> na2 <sub>1</sub>                                                        | <i>P</i> 2 <sub>1</sub> / <i>n</i>                                              |
| <i>a</i> /Å                                                  | 5.5050(2)                                                                    | 34.8416(12)                                                                         | 5.6410(10)                                                                   | 9.945(16)                                                                        | 12.3515(9)                                                                      |
| <i>b</i> /Å                                                  | 15.5099(5)                                                                   | 5.7437(2)                                                                           | 15.610(3)                                                                    | 9.340(15)                                                                        | 20.4246(15)                                                                     |
| <i>c</i> /Å                                                  | 36.8473(10)                                                                  | 18.0193(6)                                                                          | 35.093(7)                                                                    | 36.37(6)                                                                         | 19.0171(14)                                                                     |
| $\alpha$ /°                                                  | 90                                                                           | 90                                                                                  | 90                                                                           | 90                                                                               | 90                                                                              |
| $\beta$ /°                                                   | 90.06                                                                        | 119.322(2)                                                                          | 90                                                                           | 90                                                                               | 97.138(2)                                                                       |
| $\gamma$ /°                                                  | 90                                                                           | 90                                                                                  | 90                                                                           | 90                                                                               | 90                                                                              |
| Volume/Å <sup>3</sup>                                        | 3146.09(18)                                                                  | 3144.02(19)                                                                         | 3090.1(10)                                                                   | 3378(9)                                                                          | 4760.3(6)                                                                       |
| <i>Z</i>                                                     | 4                                                                            | 8                                                                                   | 4                                                                            | 4                                                                                | 4                                                                               |
| $\rho_{\text{calc}}$ /cm <sup>3</sup>                        | 1.294                                                                        | 1.441                                                                               | 1.460                                                                        | 1.559                                                                            | 1.426                                                                           |
| $\mu$ /mm <sup>-1</sup>                                      | 0.823                                                                        | 0.837                                                                               | 0.853                                                                        | 1.094                                                                            | 1.069                                                                           |
| <i>F</i> (000)                                               | 1296.0                                                                       | 1412.0                                                                              | 1416.0                                                                       | 1616.0                                                                           | 2120.0                                                                          |
| Crystal size/mm <sup>3</sup>                                 | 0.5 × 0.3 × 0.1                                                              | 0.36 × 0.2 × 0.1                                                                    | 0.3 × 0.15 × 0.1                                                             | 0.31 × 0.31 × 0.21                                                               | 0.32 × 0.3 × 0.2                                                                |
| Radiation                                                    | MoK $\alpha$ ( $\lambda$ = 0.71073)                                          | MoK $\alpha$ ( $\lambda$ = 0.71073)                                                 | MoK $\alpha$ ( $\lambda$ = 0.71073)                                          | MoK $\alpha$ ( $\lambda$ = 0.71073)                                              | MoK $\alpha$ ( $\lambda$ = 0.71073)                                             |
| 2 $\theta$ range for data collection/°                       | 2.848 to 52.036                                                              | 4.524 to 54.706                                                                     | 2.856 to 50.782                                                              | 4.48 to 54.568                                                                   | 4.536 to 57.99                                                                  |
| Index ranges                                                 | -6 ≤ <i>h</i> ≤ 6, -19 ≤ <i>k</i> ≤ 19, -45 ≤ <i>l</i> ≤ 44                  | -44 ≤ <i>h</i> ≤ 44, -7 ≤ <i>k</i> ≤ 7, -22 ≤ <i>l</i> ≤ 23                         | -6 ≤ <i>h</i> ≤ 6, -18 ≤ <i>k</i> ≤ 18, -42 ≤ <i>l</i> ≤ 42                  | -12 ≤ <i>h</i> ≤ 12, -12 ≤ <i>k</i> ≤ 11, -46 ≤ <i>l</i> ≤ 46                    | -16 ≤ <i>h</i> ≤ 16, -27 ≤ <i>k</i> ≤ 27, -25 ≤ <i>l</i> ≤ 25                   |
| Reflections collected                                        | 38063                                                                        | 20524                                                                               | 38249                                                                        | 42885                                                                            | 55019                                                                           |
| Independent reflections                                      | 5639 [ <i>R</i> <sub>int</sub> = 0.0786, <i>R</i> <sub>sigma</sub> = 0.0956] | 3359 [ <i>R</i> <sub>int</sub> = 0.1088, <i>R</i> <sub>sigma</sub> = 0.0941]        | 5652 [ <i>R</i> <sub>int</sub> = 0.0947, <i>R</i> <sub>sigma</sub> = 0.0684] | 7516 [ <i>R</i> <sub>int</sub> = 0.0547, <i>R</i> <sub>sigma</sub> = 0.0411]     | 12443 [ <i>R</i> <sub>int</sub> = 0.0659, <i>R</i> <sub>sigma</sub> = 0.0627]   |
| Data/restraints/parameters                                   | 5639/0/382                                                                   | 3359/0/243                                                                          | 5652/0/422                                                                   | 7516/1/450                                                                       | 12443/0/692                                                                     |
| Goodness-of-fit on <i>F</i> <sup>2</sup>                     | 0.895                                                                        | 1.260                                                                               | 1.111                                                                        | 1.038                                                                            | 1.095                                                                           |
| Final <i>R</i> indexes [ <i>I</i> ≥ 2 $\sigma$ ( <i>I</i> )] | <i>R</i> <sub>1</sub> = 0.0435, <i>wR</i> <sub>2</sub> = 0.0912              | <i>R</i> <sub>1</sub> = 0.0998, <i>wR</i> <sub>2</sub> = 0.1787                     | <i>R</i> <sub>1</sub> = 0.0535, <i>wR</i> <sub>2</sub> = 0.0857              | <i>R</i> <sub>1</sub> = 0.0531, <i>wR</i> <sub>2</sub> = 0.1285                  | <i>R</i> <sub>1</sub> = 0.0571, <i>wR</i> <sub>2</sub> = 0.1214                 |
| Final <i>R</i> indexes [all data]                            | <i>R</i> <sub>1</sub> = 0.0929, <i>wR</i> <sub>2</sub> = 0.1019              | <i>R</i> <sub>1</sub> = 0.1474, <i>wR</i> <sub>2</sub> = 0.1922                     | <i>R</i> <sub>1</sub> = 0.0859, <i>wR</i> <sub>2</sub> = 0.0952              | <i>R</i> <sub>1</sub> = 0.0720, <i>wR</i> <sub>2</sub> = 0.1383                  | <i>R</i> <sub>1</sub> = 0.0781, <i>wR</i> <sub>2</sub> = 0.1291                 |
| Largest diff. peak/hole / e Å <sup>-3</sup>                  | 0.28/-0.23                                                                   | 0.95/-0.96                                                                          | 0.44/-0.64                                                                   | 0.50/-0.43                                                                       | 0.95/-0.93                                                                      |
| Flack parameter                                              | -                                                                            | -                                                                                   | 0.017(8)                                                                     | -                                                                                | -                                                                               |

## 2. IR data of the Coordination polymers (CPs).

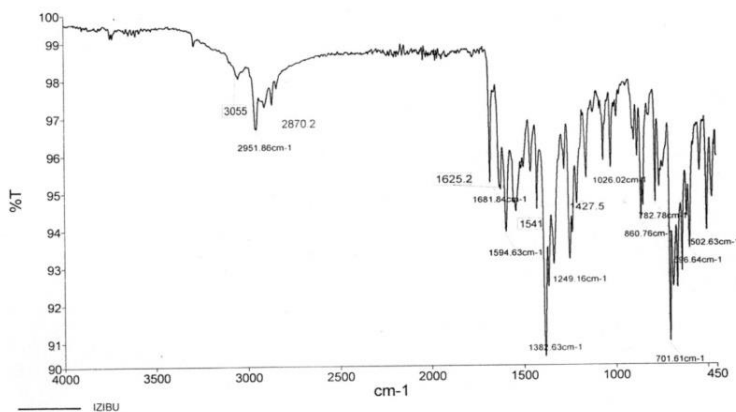

Figure S1: FT-IR spectra of IZIBU

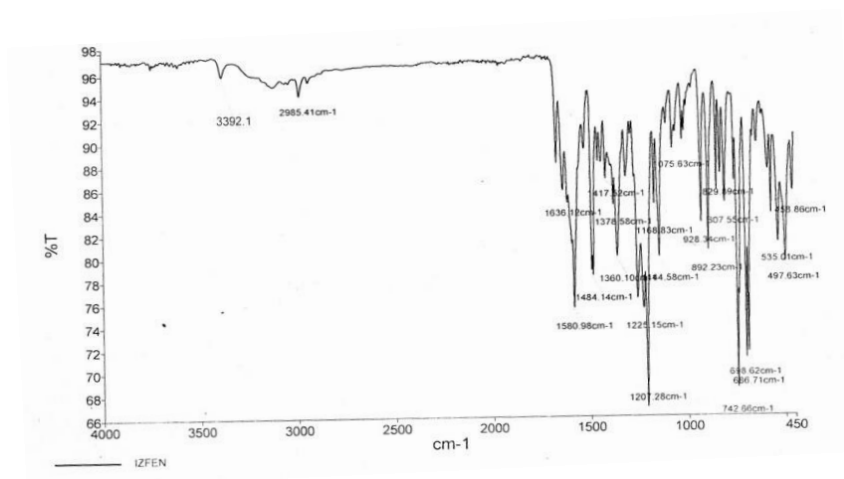

Figure S2: FT-IR spectra of IZFEN

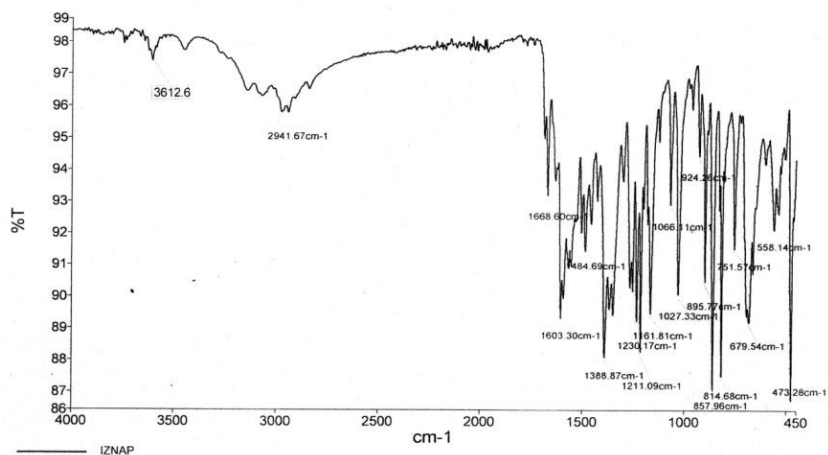

**Figure S3: FT-IR spectra of IZNAP**

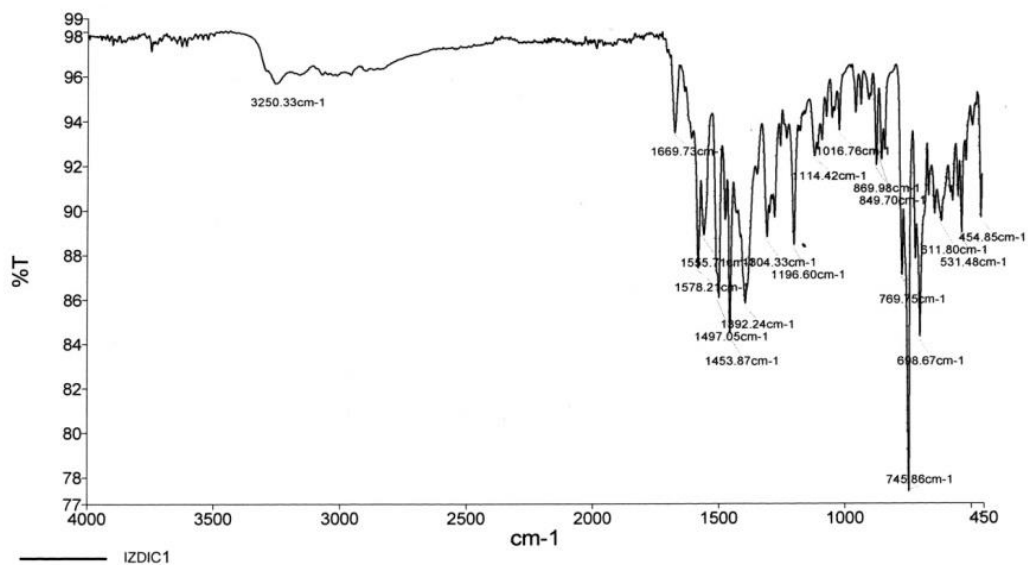

**Figure S4: FT-IR spectra of IZDIC**

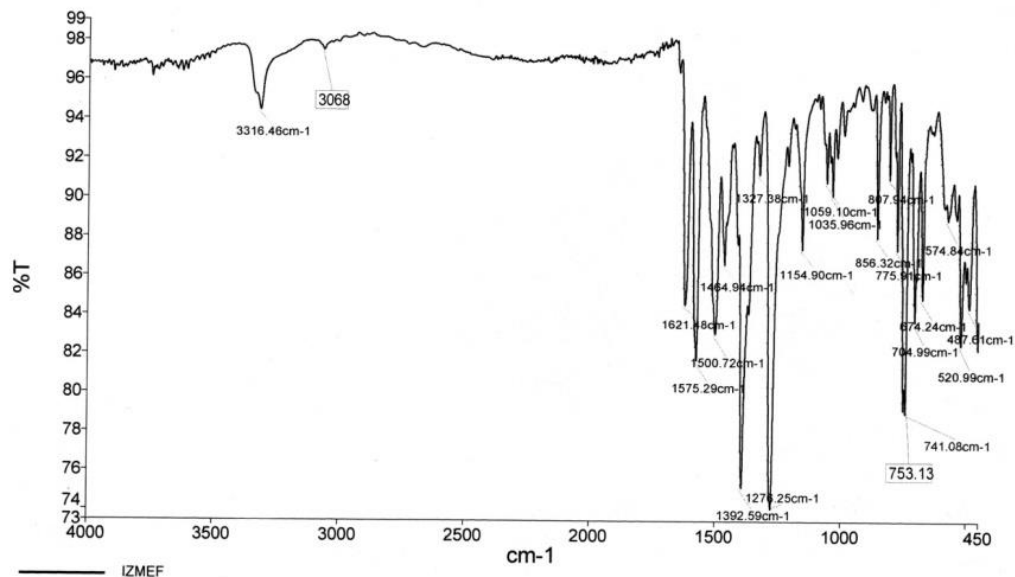

**Figure S5: FT-IR spectra of IZMEF**

### 3. ORTEP and H bond table of the crystals structure

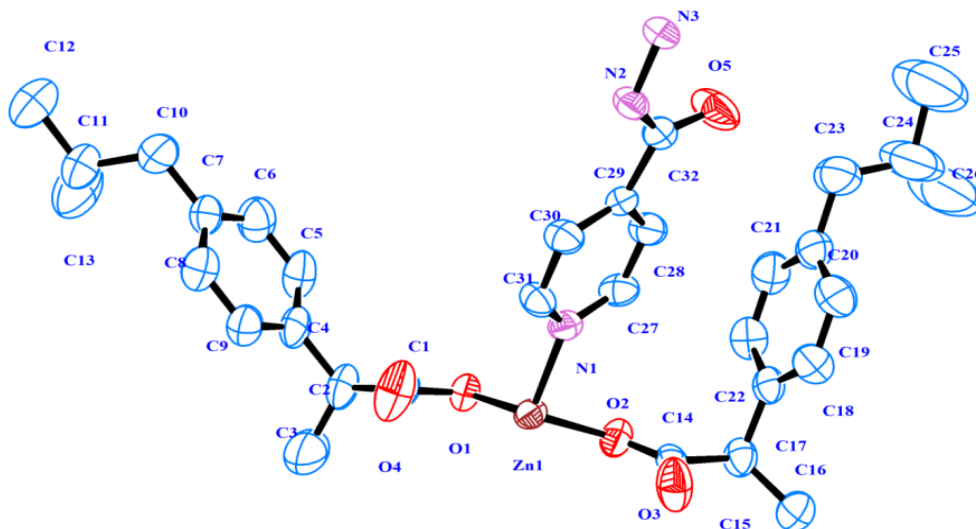

Figure S6: ORTEP of IZIBU.

| D-H...A        | d(D-H)<br>(Å) | d(H...A)<br>(Å) | ∠DHA (°) | d(D...A)<br>(Å) | Symmetry              |
|----------------|---------------|-----------------|----------|-----------------|-----------------------|
| N2 - H2...O3   | 0.91(4)       | 1.81(4)         | 166(3)   | 2.708(4)        | [2-x, 1/2 +y, 1/2 -z] |
| N3 - H3A...O1  | 0.98(4)       | 2.01(4)         | 167(3)   | 2.964(4)        | [1-x, 1/2 +y, 1/2 -z] |
| C2 - H2A...O4  | 0.98          | 2.59            | 177      | 3.564(5)        | [-1+x, y, z]          |
| C30 - H30...O3 | 0.93          | 2.54            | 150      | 3.377(4)        | [2-x, 1/2+y, 1/2-z]   |
| C31 -H31...O1  | 0.93          | 2.52            | 148      | 3.344(4)        | [1+x, y, z]           |

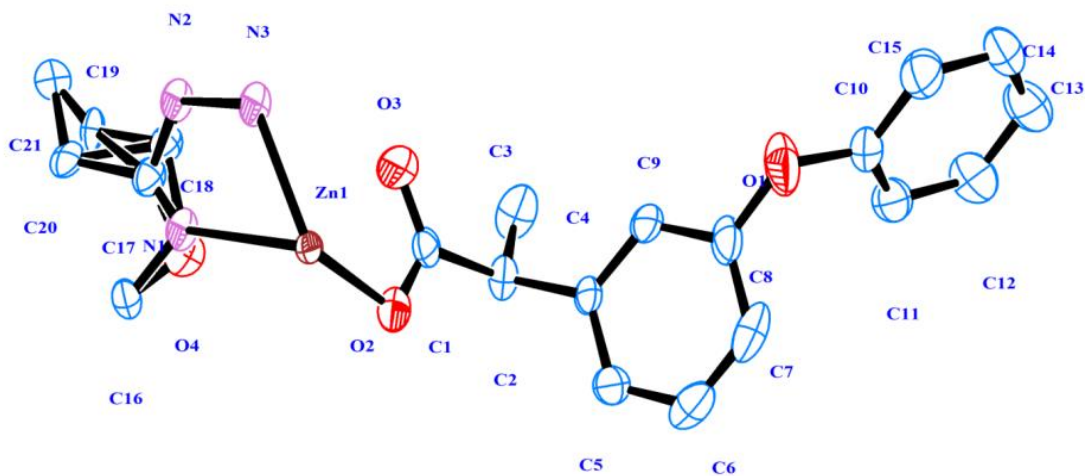

Figure S7: ORTEP of IZFEN.

| D-H...A    | d(D-H)<br>(Å) | d(H...A)<br>(Å) | ∠DHA (°) | d(D...A)<br>(Å) | Symmetry          |
|------------|---------------|-----------------|----------|-----------------|-------------------|
| N3-H3...O3 | 0.94(8)       | 2.23(7)         | 124(6)   | 2.870(14)       | [1-x, 1+y, 3/2-z] |
| C5-H5...31 | 0.93          | 2.43            | 170      | 3.354(9)        | [1-x, +y, z]      |

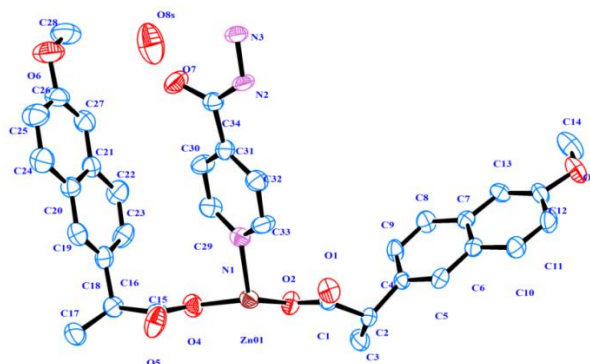

Figure S8: ORTEP of IZNAP.

| D-H...A      | d(D-H)<br>(Å) | d(H...A)<br>(Å) | ∠DHA (°) | d(D...A)<br>(Å) | Symmetry                |
|--------------|---------------|-----------------|----------|-----------------|-------------------------|
| N2-H2...O5   | 0.86          | 1.903           | 150.57   | 2.686(6)        | [ -x+2, y+1/2, -z+3/2 ] |
| N3-H3A...O8S | 0.89          | 2.018           | 163.25   | 2.882(8)        | [ x+1, y, z ]           |
| N3-H3B...O2  | 0.89          | 2.125           | 163.02   | 2.987(6)        | [ -x+1, y+1/2, -z+3/2 ] |
| C3-H3E...O1  | 0.96          | 2.53            | 3.484(7) | 175             | [ -1+x,y,z]             |
| C23-H23...O5 | 0.93          | 2.4900          | 3.381(7) | 161             | [ -1+x,y,z]             |

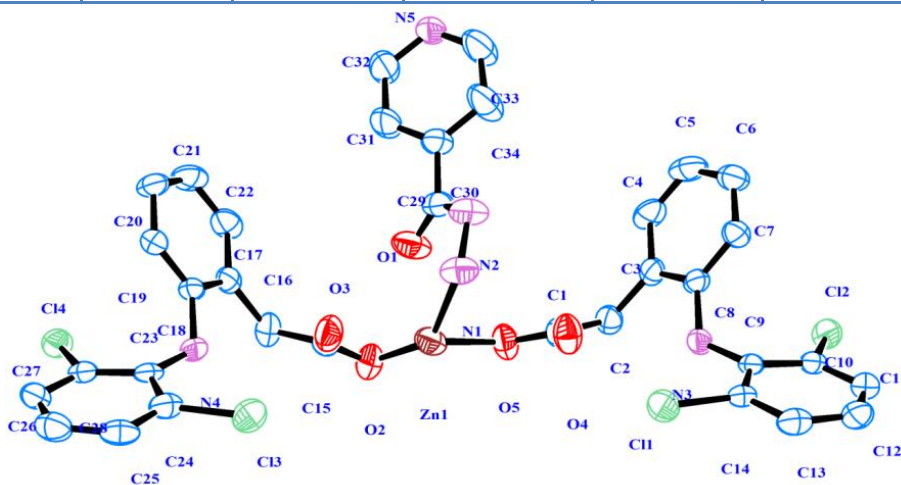

Figure S9: ORTEP of IZDIC.

| <b>D-H...A</b>        | <b>d(D-H)<br/>(Å)</b> | <b>d(H...A)<br/>(Å)</b> | <b>∠DHA (°)</b> | <b>d(D...A)<br/>(Å)</b> | <b>Symmetry</b>     |
|-----------------------|-----------------------|-------------------------|-----------------|-------------------------|---------------------|
| <b>N1-H1A...O1</b>    | 0.89                  | 2.351                   | 132.22          | 3.022(10)               | [ x-1/2,- y+1/2, z] |
| <b>N2- H2...O5</b>    | 0.56                  | 2.002                   | 152.9           | 2.796(10)               | [x-1/2, -y+1/2, z]  |
| <b>C32-H32...O3</b>   | 0.93                  | 2.630                   | 122.56          | 3.226(12)               | [ x, y+1, z ]       |
| <b>C33-H33 ...O43</b> | 0.93                  | 2.333                   | 141.43          | 3.114(12)               | [x,y+1,z]           |

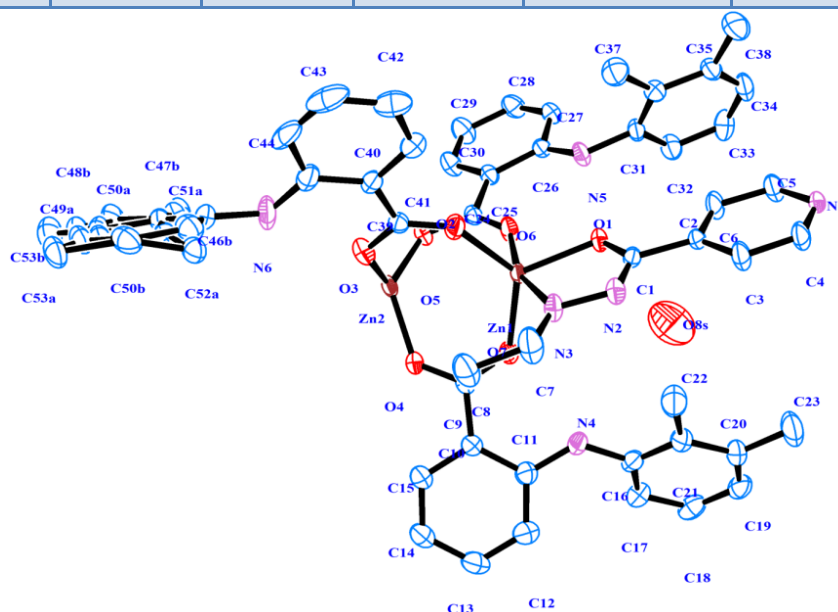

**Figure S10:** ORTEP of IZMEF.

| <b>D-H...A</b>        | <b>d(D-H)<br/>(Å)</b> | <b>d(H...A)<br/>(Å)</b> | <b>∠DHA (°)</b> | <b>d(D...A)<br/>(Å)</b> | <b>Symmetry</b>     |
|-----------------------|-----------------------|-------------------------|-----------------|-------------------------|---------------------|
| <b>C13-H13...O8S</b>  | 0.95                  | 2.51                    | 137             | 3.269(10)               | 1+x,y,z             |
| <b>C18-H18... O5</b>  | 0.95                  | 2.49                    | 155             | 3.376(4)                | 1/2+x,3/2-y,1/2+z   |
| <b>C43-H43...O1</b>   | 0.95                  | 2.43                    | 153             | 3.309(6)                | -1/2+x,3/2-y,-1/2+z |
| <b>C53A-H53C...O5</b> | 0.98                  | 2.52                    | 155             | 3.428(9)                | -1/2+x,3/2-y,-1/2+z |



#### 4. Single Crystal structure and model.

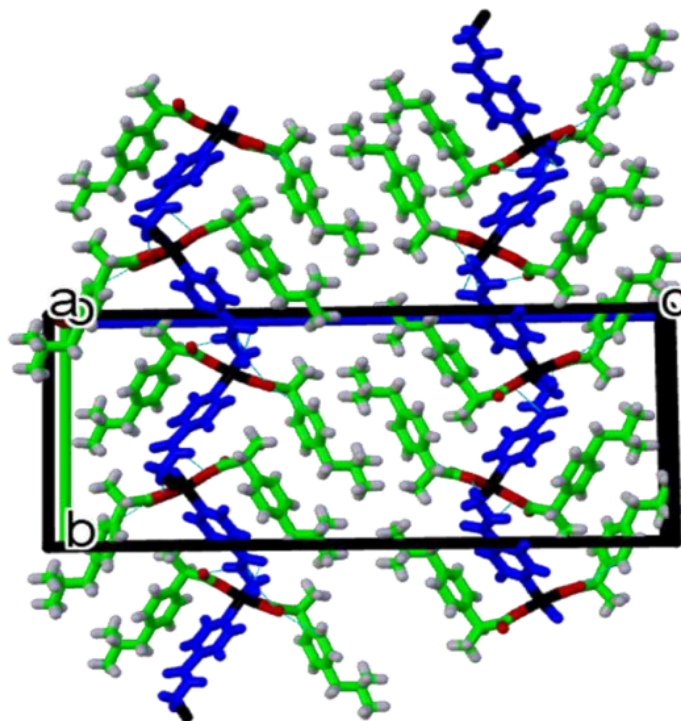

**Figure S11:** Overall packing diagram of IZIBU in its crystal structure.

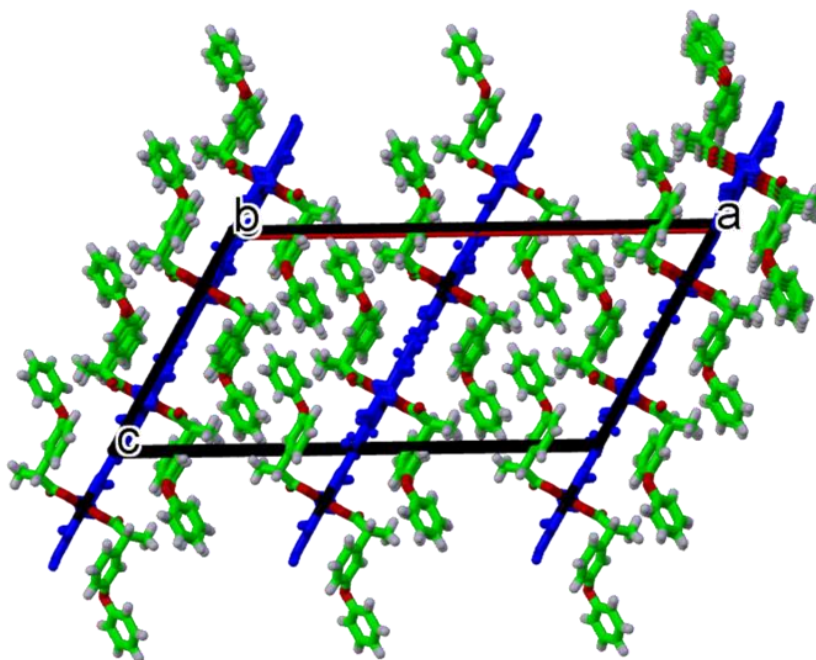

**Figure S12:** Overall packing diagram of IZFEN in its crystal structure.

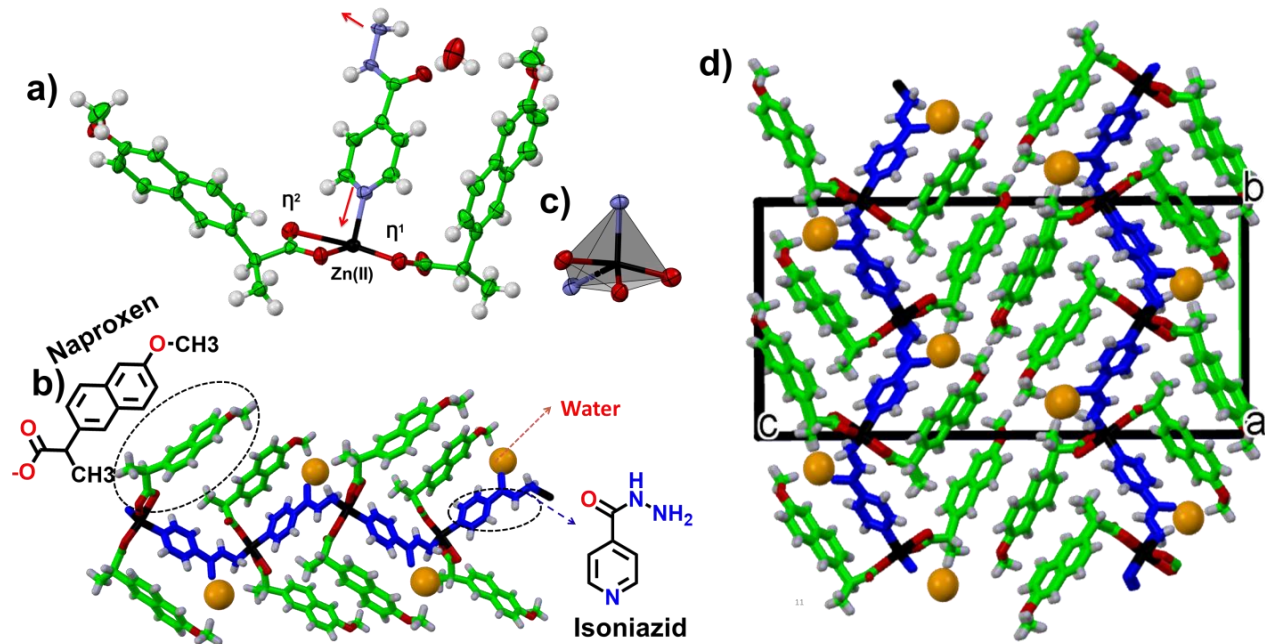

**Figure S13:** Crystal structure illustration of **IZNAP**; a) the asymmetric unit, b) 1D extended polymeric chain c) coordination environment of Zn(II) metal d) overall packing diagram.

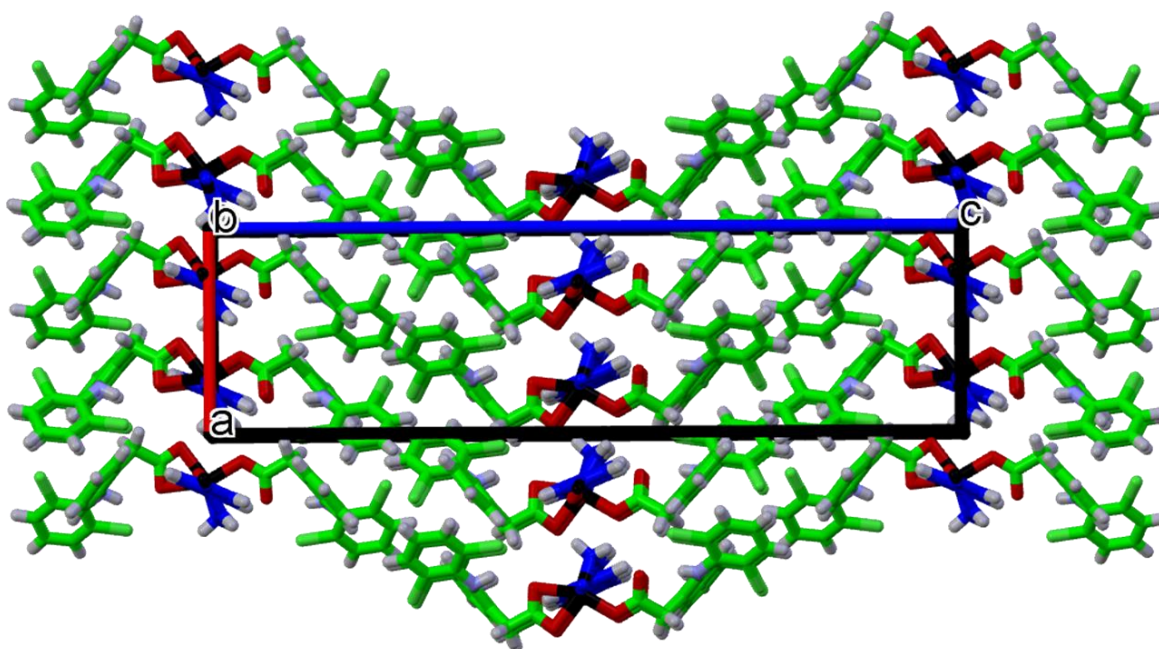

**Figure S14:** Overall packing diagram of **IZDIC** in its crystal structure.

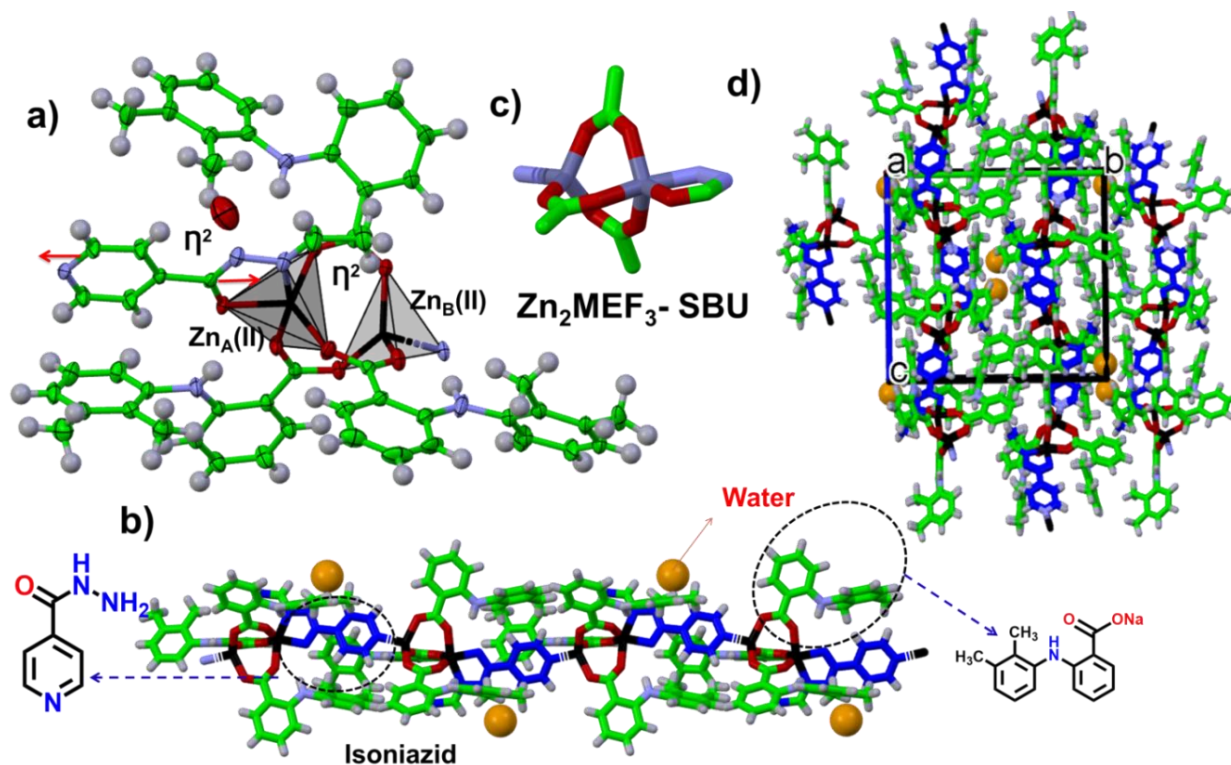

**Figure S15:** Crystal structure illustration of **IZMEF (IZ-EtMEF)**; a) the asymmetric unit, b) 1D extended polymeric chain c) [Zn(II)<sub>2</sub>][MEF]<sub>3</sub> cluster d) overall packing diagram.

## 5. Powder X-ray diffraction study

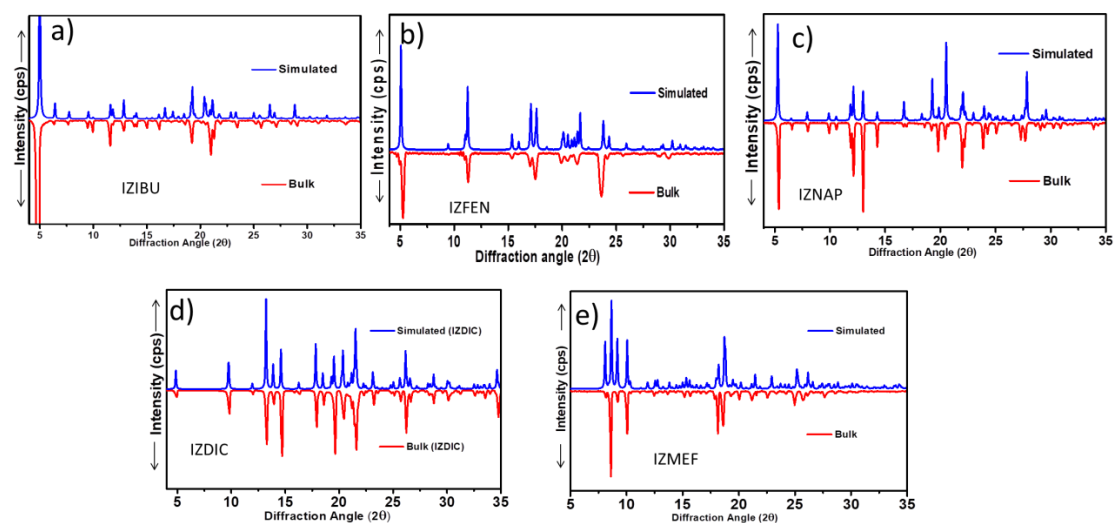

**Figure S16:** PXRD patterns of a) **IZIBU**, b) **IZFEN**, c) **IZNAP**, d) **IZDIC**, e) **IZMEF** represented as mirror plot to assess the agreement of peak position.

## 6. Dynamic Light scattering and Zeta potential measurements

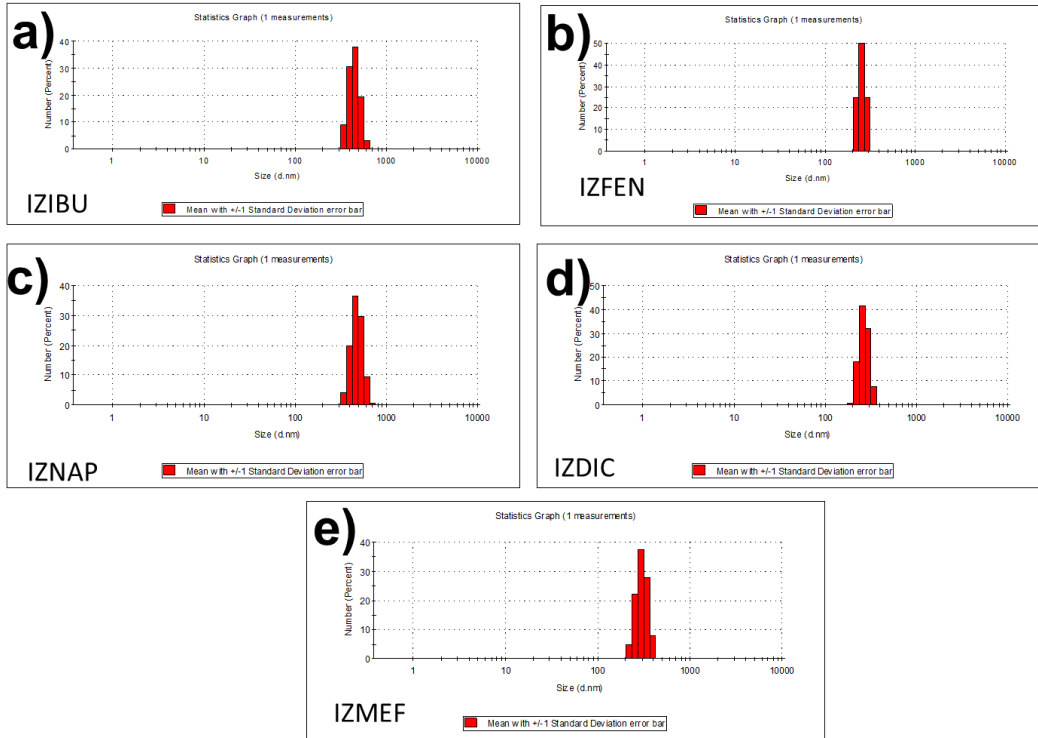

**Figure S17:** DLS traces of water dispersed nano CPs a) **IZIBU**, b) **IZFEN**, c) **IZNAP**, d) **IZDIC**, e) **IZMEF**

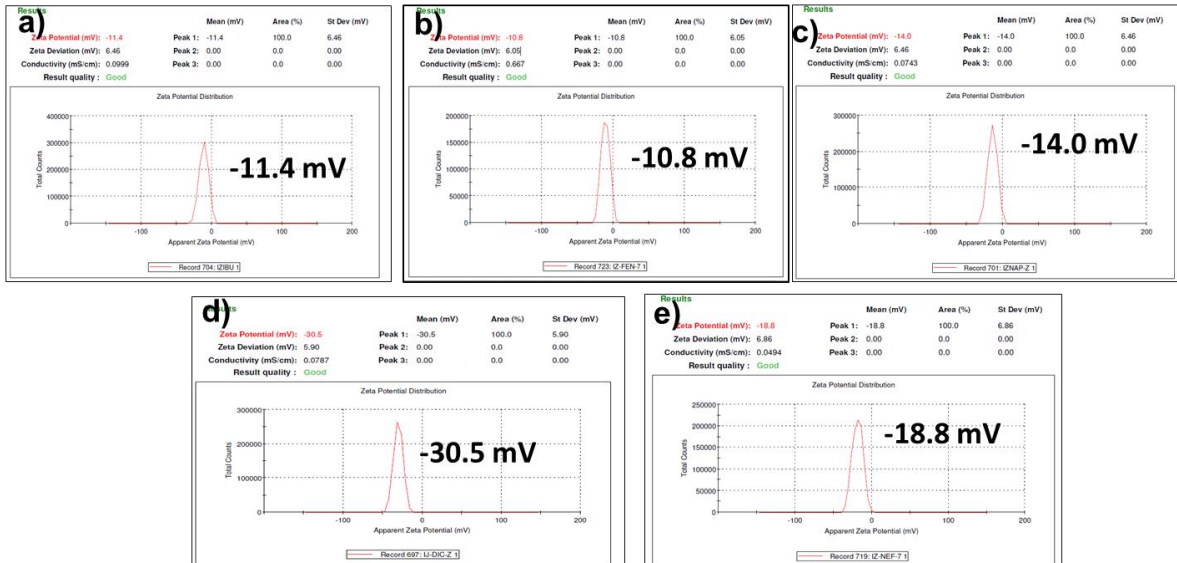

**Figure S18:** Zeta potential measurement of water dispersed nano CPs a) **IZIBU**, b) **IZFEN**, c) **IZNAP**, d) **IZDIC**, e) **IZMEF**.

7. Anti-bacterial zone inhibition assays:

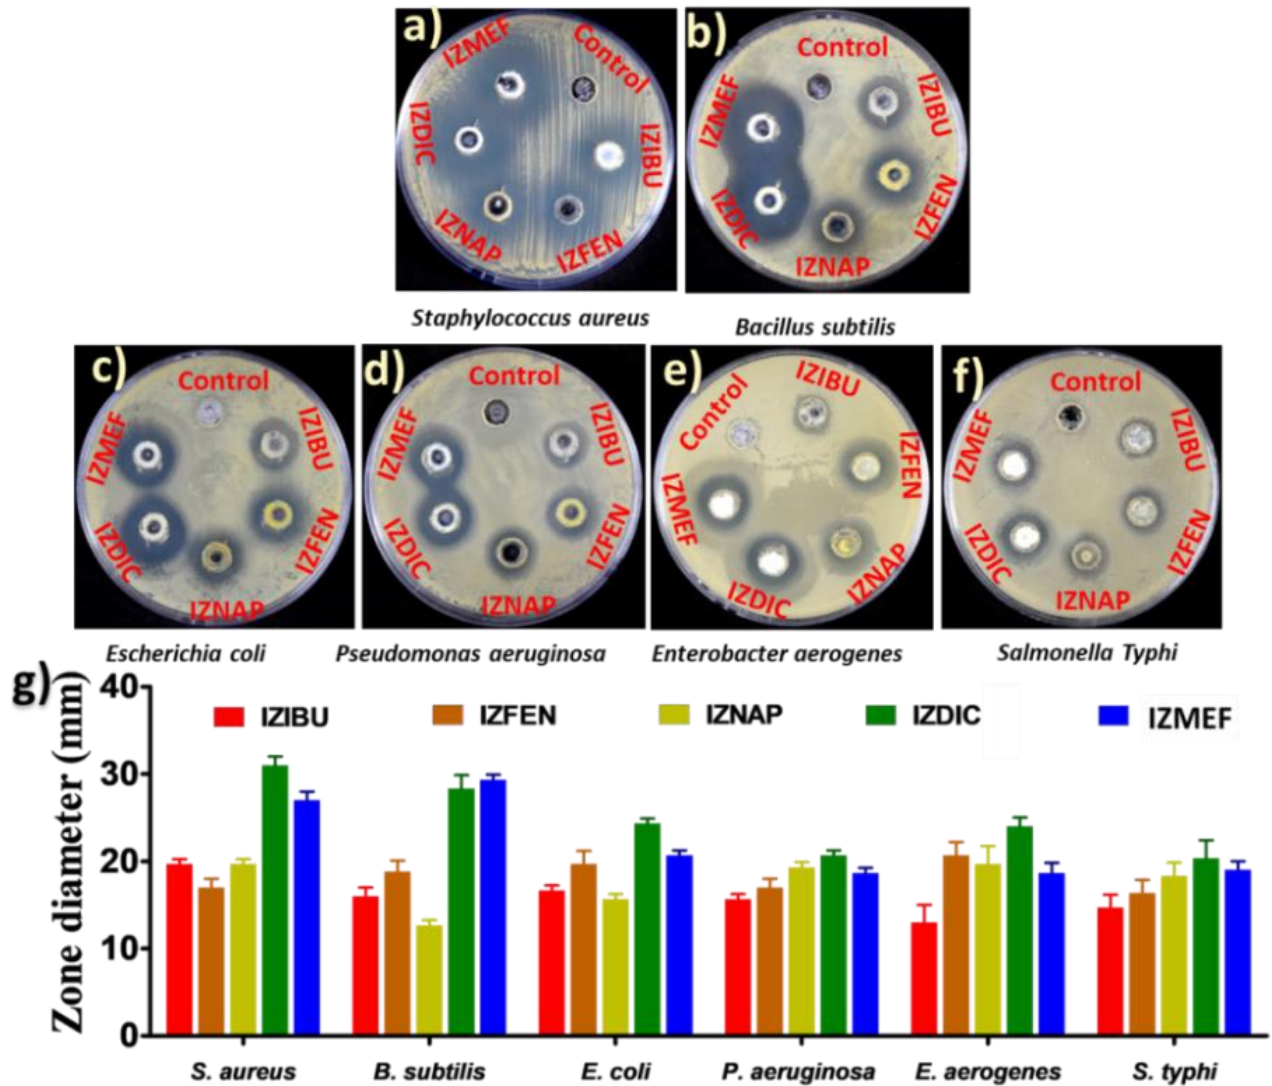

**Figure S19:** Assessing anti-bacterial property of the CP by zone inhibition assay (each groove contains 1 mg CP in 20  $\mu$ L DMSO; control - 20  $\mu$ L DMSO); a-b) gram +ve bacteria, c-f) gram -ve bacteria g) zone diameter.

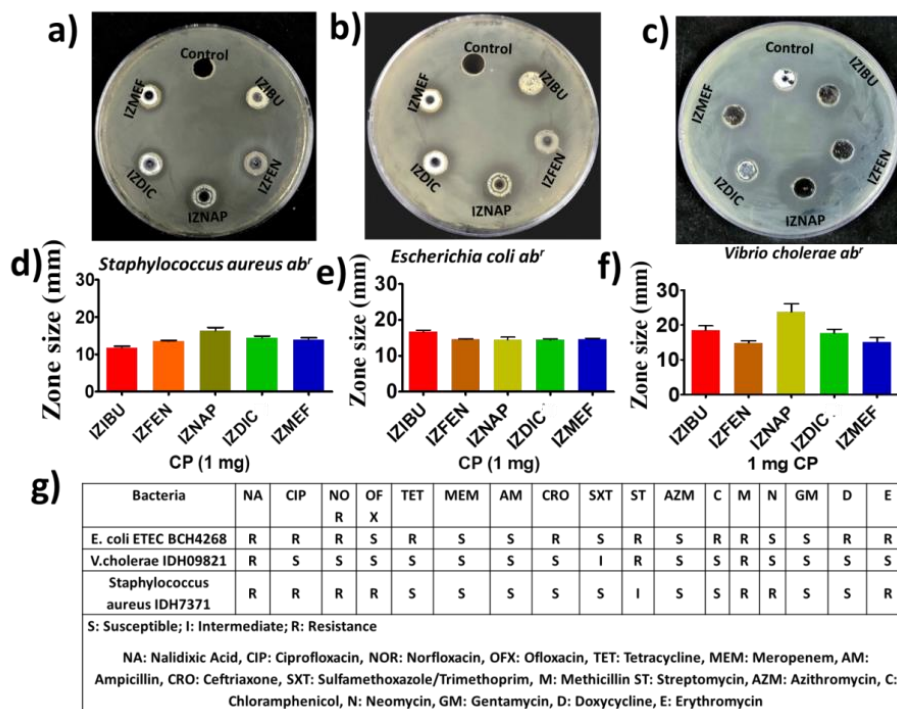

**Figure S20:** Assessing anti-bacterial property of the CP by zone inhibition assay (each groove contains 1 mg CP in 20  $\mu$ L DMSO; control - 20  $\mu$ L DMSO) against a-c) antibiotic resistant strains, d-f) zone diameter, g) antibiogram of the bacterial strains.

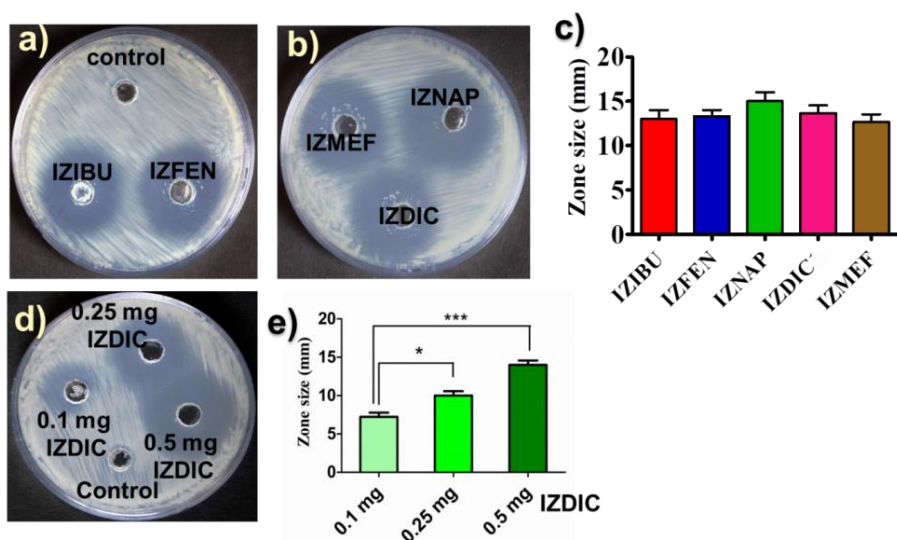

**Figure S21:** Assessing anti-bacterial property of the CP by zone inhibition assay (each groove contains 0.5 mg CP in 20  $\mu$ L DMSO; control - 20  $\mu$ L DMSO) against a-b) *M.smeg*, c) zone diameter, d) concentration dependent zone inhibition of *M.smeg* by IZDIC and e) the corresponding zone diameters (data represented as mean + SD, where \*p<0.05, \*\*\*p<0.001, n=3)

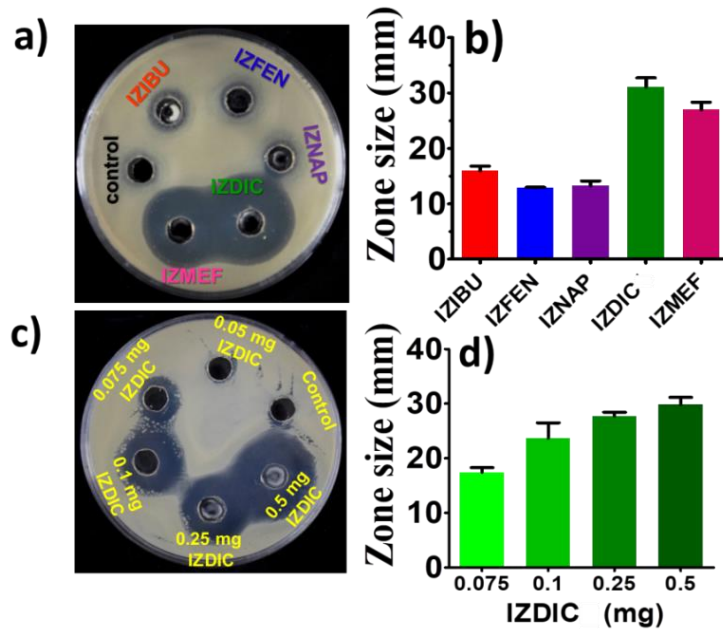

**Figure S22:** Assessing anti-bacterial property of the CP by zone inhibition assay (each groove contains 0.5 mg CP in 20  $\mu$ L DMSO; control - 20  $\mu$ L DMSO) against a-b) M.tb, c) zone diameter, d) concentration dependent zone inhibition of M.Tb by **IZDIE** and e) the corresponding zone diameters (data represented as mean + SD, where \* $p < 0.05$ , \*\*\* $p < 0.001$ ,  $n = 3$ )

## 8. Turbidity and Resazurin assays

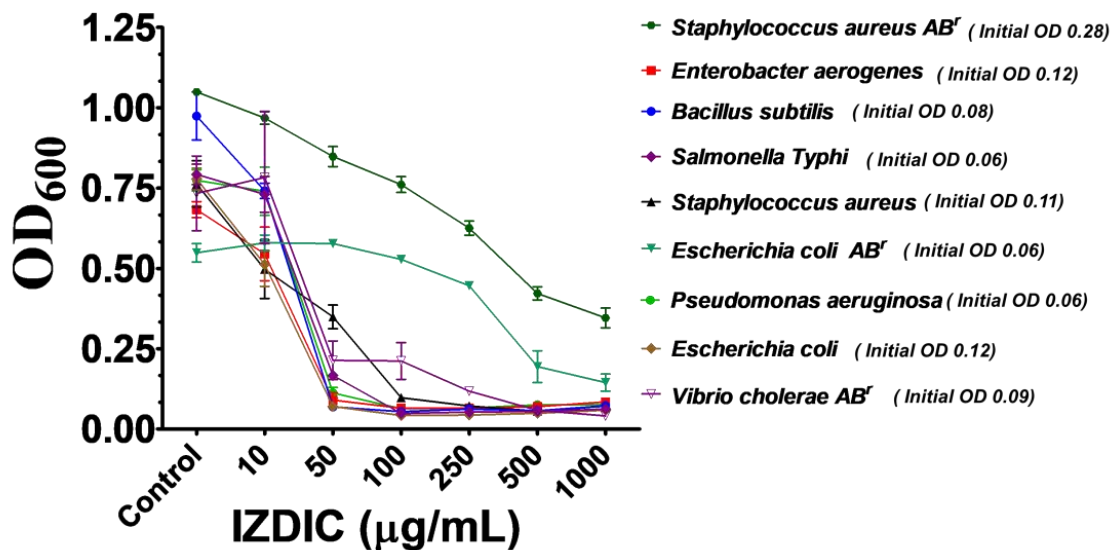

**Figure 23:** Assessing MIC of **IZDIE** by turbidity assay (incubation period 24h).

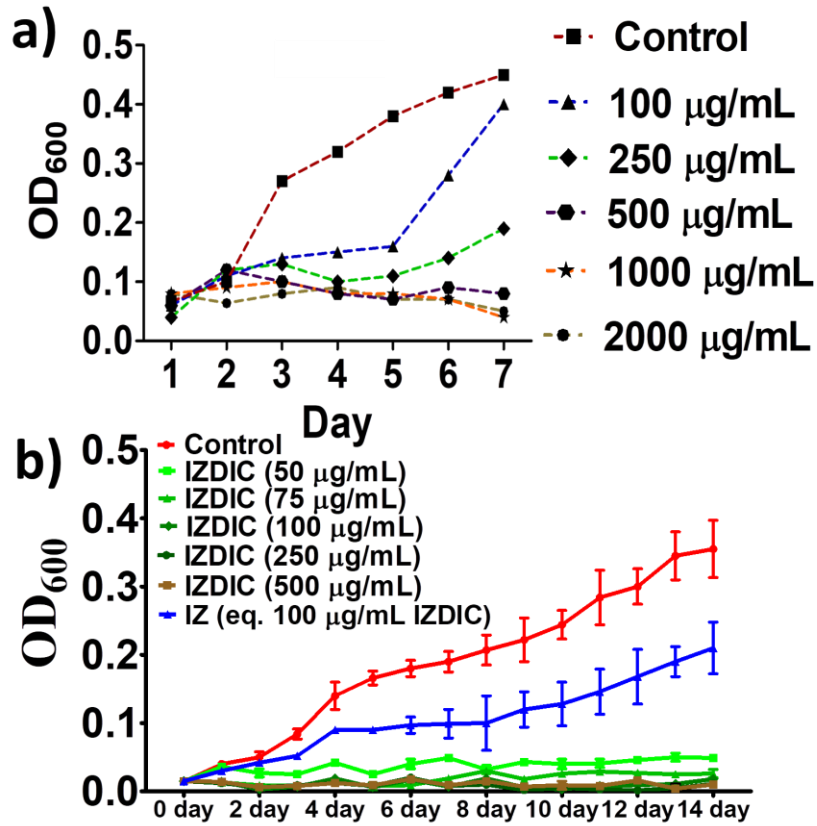

**Figure S24:** Assessing MIC of IZDIC by turbidity assay against a) *M. smegmatis*, b) *M. tb*

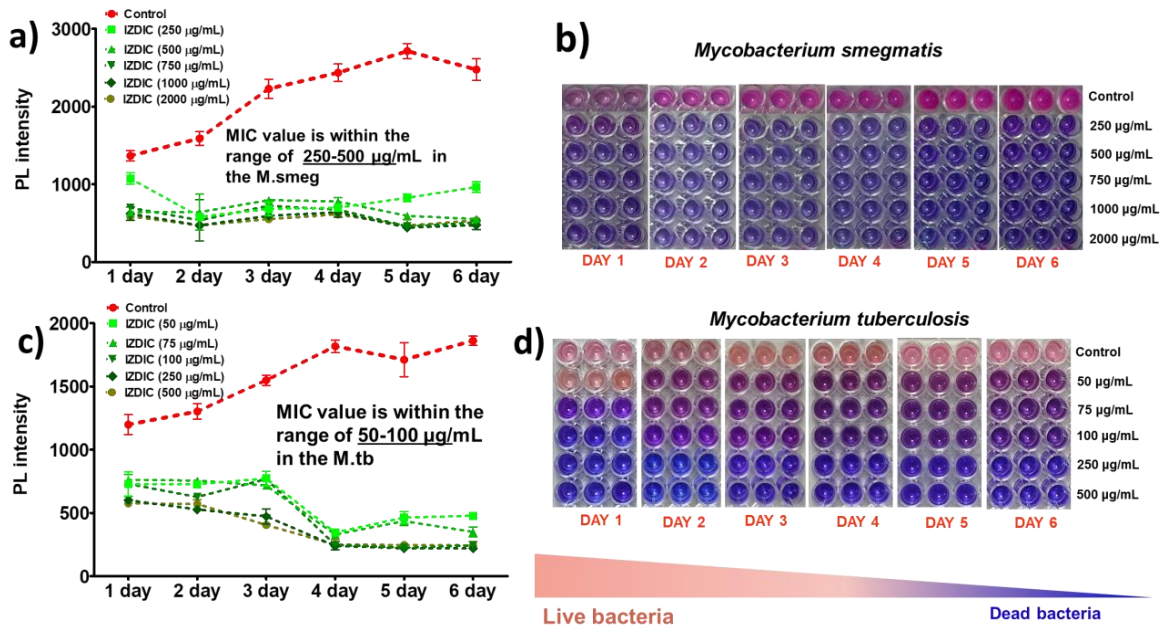

**Figure S25:** Assessing MIC of IZDIC by resazurin assay against mycobacterium sp. with fluorometric measurements and its optical colourisation; a-b) *M. smegmatis*, c-d) *M. tb*.



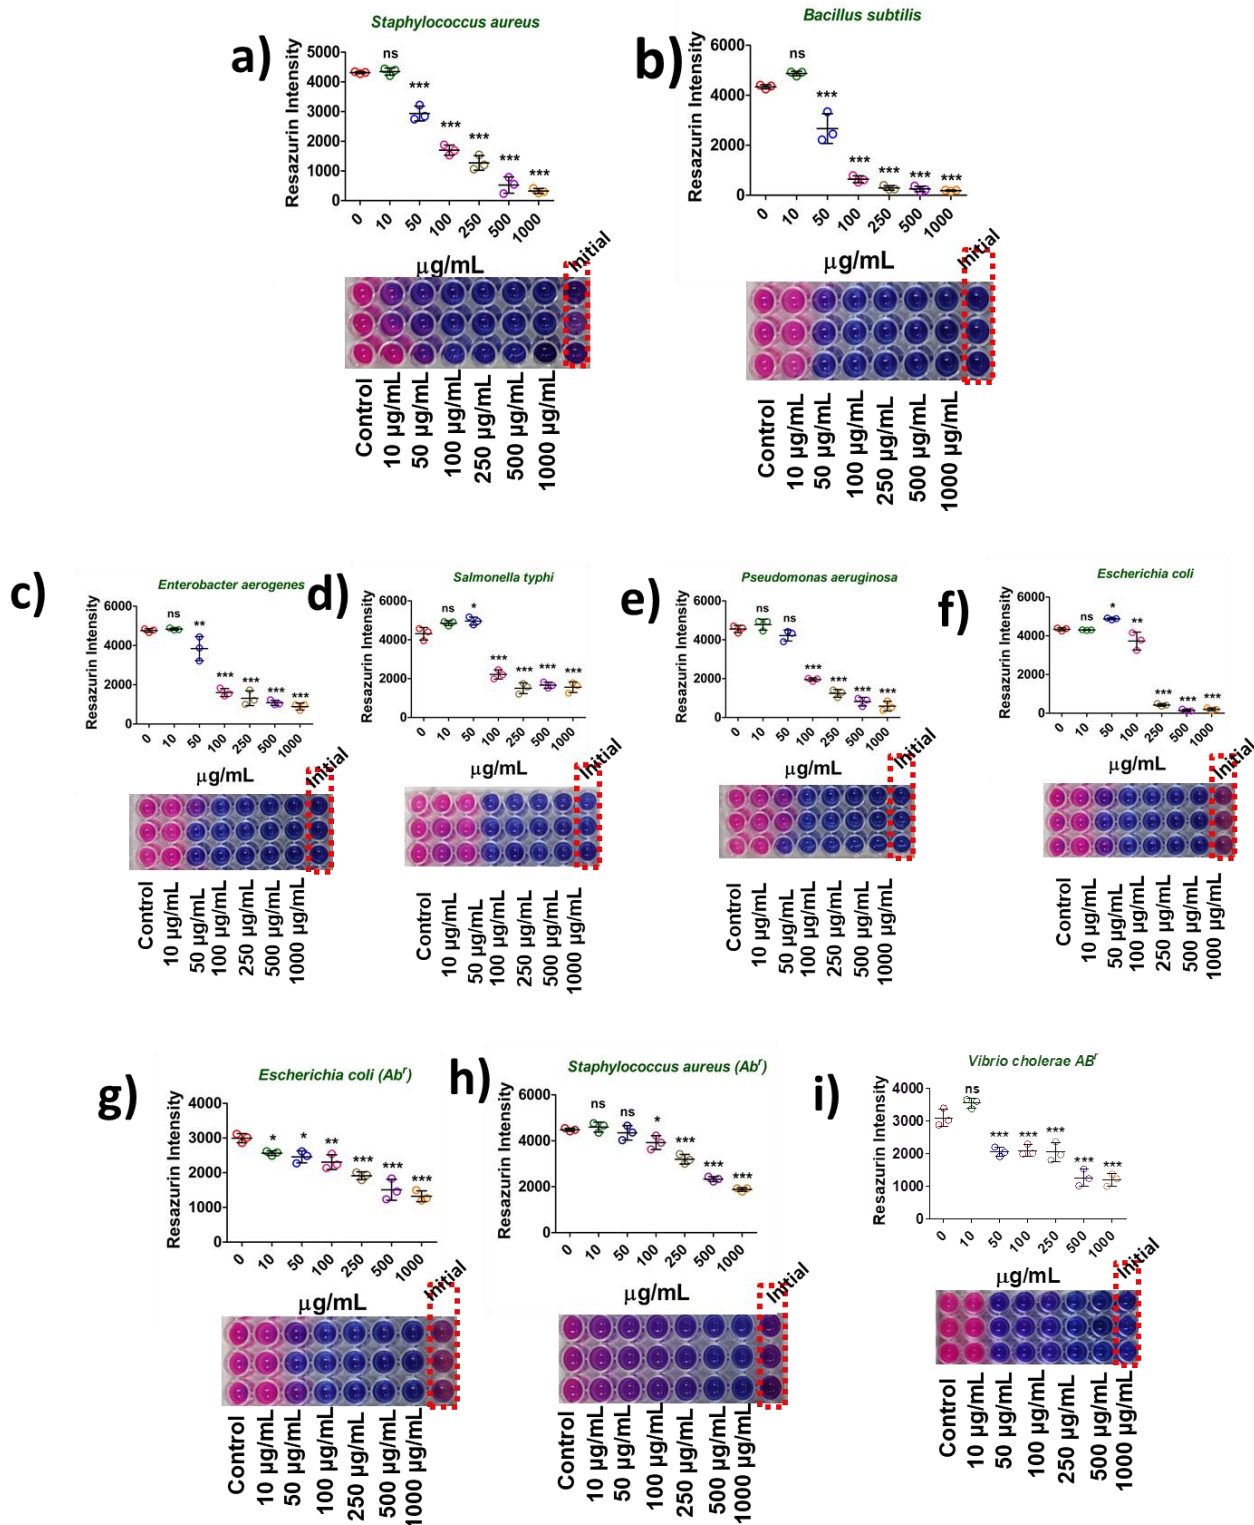

**Figure S26:** Assessing MIC of IZDIC by resazurin assay against a-b) gram positive bacteria, c-f) gram negative bacteria, g-i) various antibiotic resistant strains.(optical colourisation of each bacterial set shown below the graph)

9. Flow cytometry data of M.tb

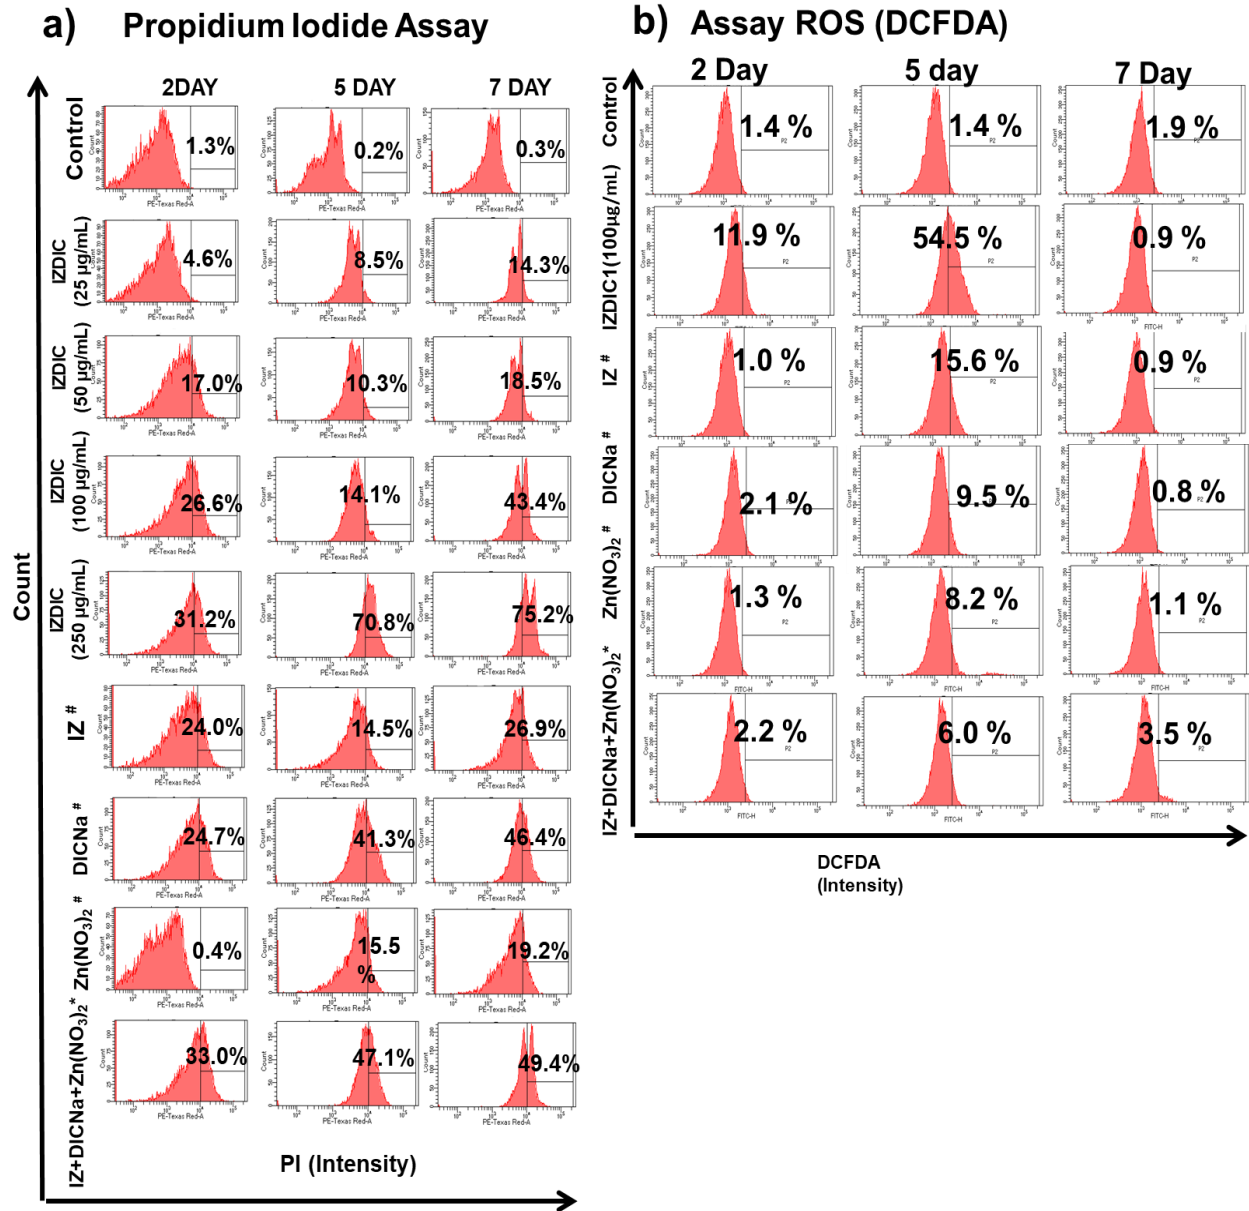

**Figure S27:** Flow cytometry data of variously treated M. tb bacteria under different staining conditions; a) cell barrier permeability assay (PI staining), b) ROS assay (DCFDA staining) (#The components **IZ**, **DICNa** and **Zn(NO<sub>3</sub>)<sub>2</sub>** of **IZDIC** were treated individually with equivalent concentration of 100 µg/mL, \* physical mixture of the components of **IZDIC** at the same concentration of 100 µg/mL)

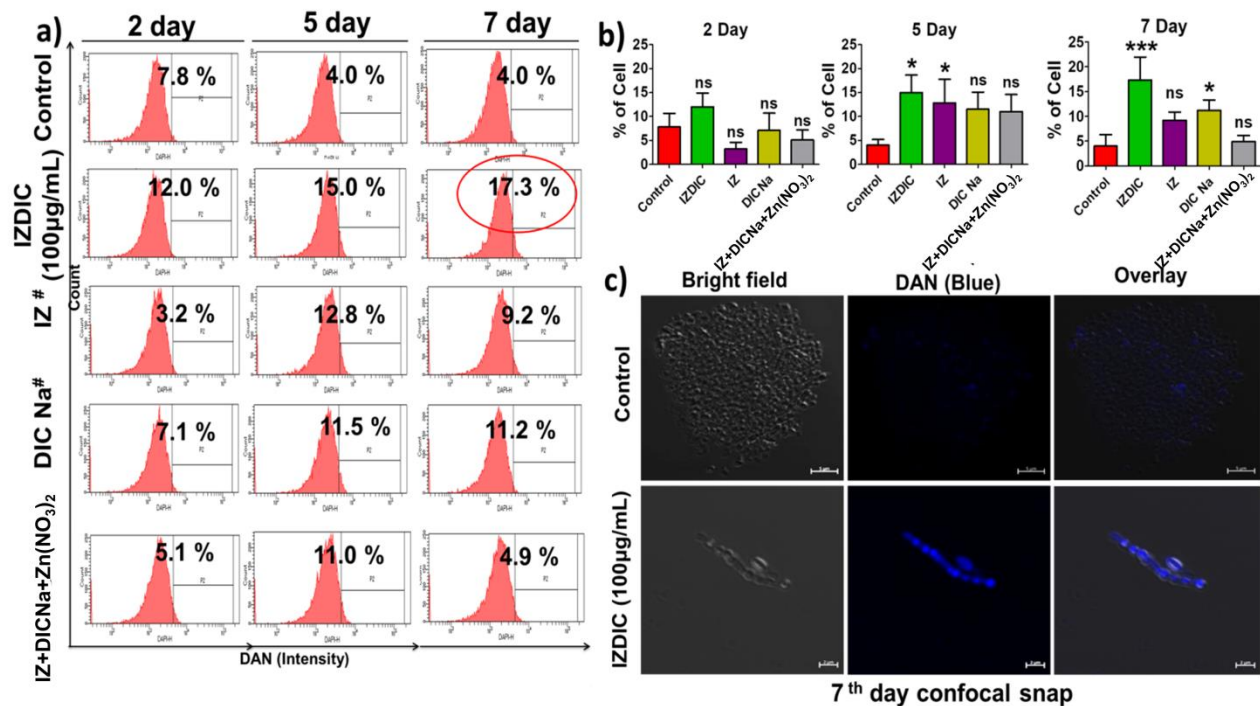

**Figure S28:** Assessing NO formation: a) flow cytometry data of variously treated *M.tb* bacteria stained with DAN (#The components **IZ**, **DICNa** and **Zn(NO<sub>3</sub>)<sub>2</sub>** of CP were treated individually with equivalent concentration of 100 µg/mL, \* physical mixture of components of **IZDIC** at the same concentration of 100 µg/mL), b) Measurements plot of flow cytometry data with statistical analysis (Data represented as mean + SD, where \* $p < 0.05$ , \*\*\* $p < 0.001$  and ns represent non-significant  $n=3$ ), c) CLSM images of *M.tb* under various conditions.

## 10. MTT-Assay data

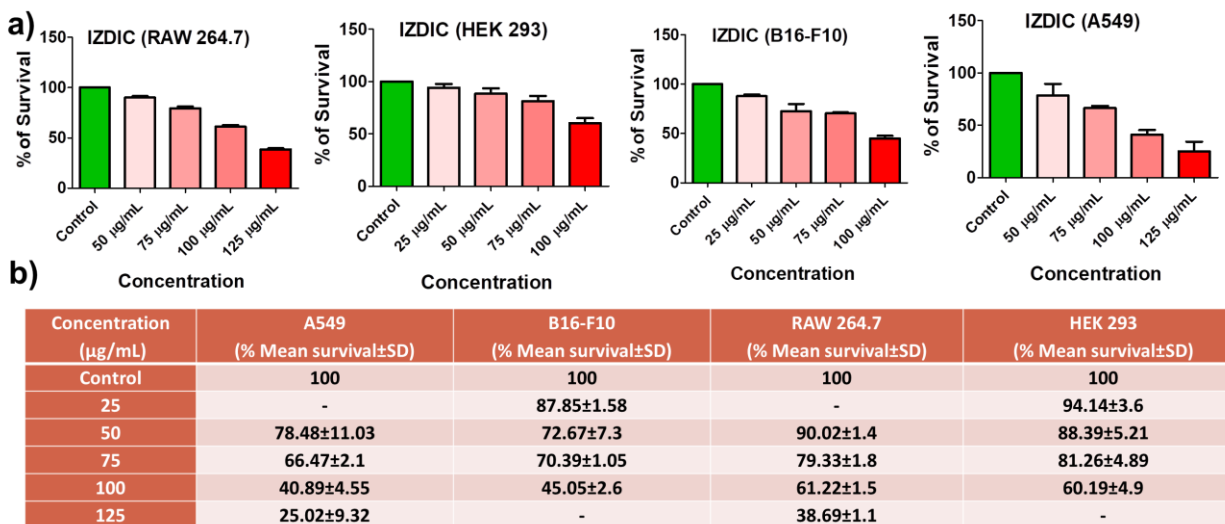

**Figure S29:** MTT-assay of **IZDIC** in different cell lines incubated for 72 h: a) in bar plot, b) in tabular form.

## 11. Infection experiment

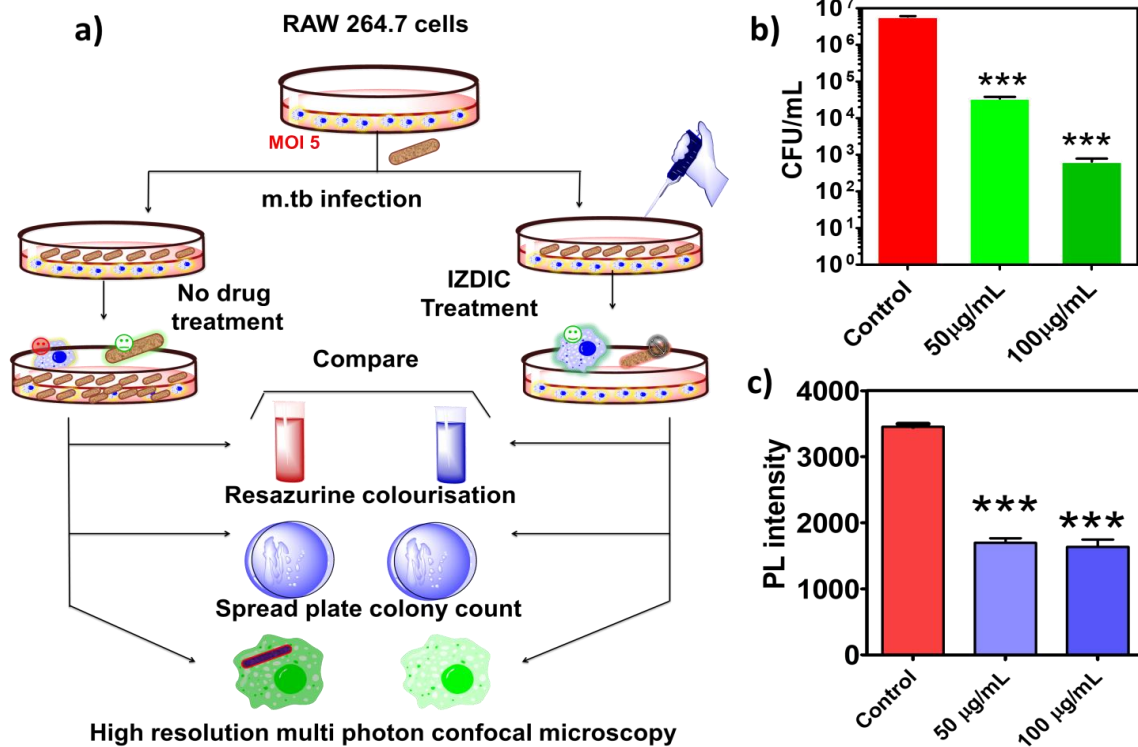

**Figure S30:** Treatment of M.tb infected macrophage (RAW 264.7) with **IZDIC**: a) experimental scheme, b) CFU measurement c) resazurin assay; (data represented as mean + SD, where \*\*\* $p < 0.001$ ).

## 12. Cell Migration data

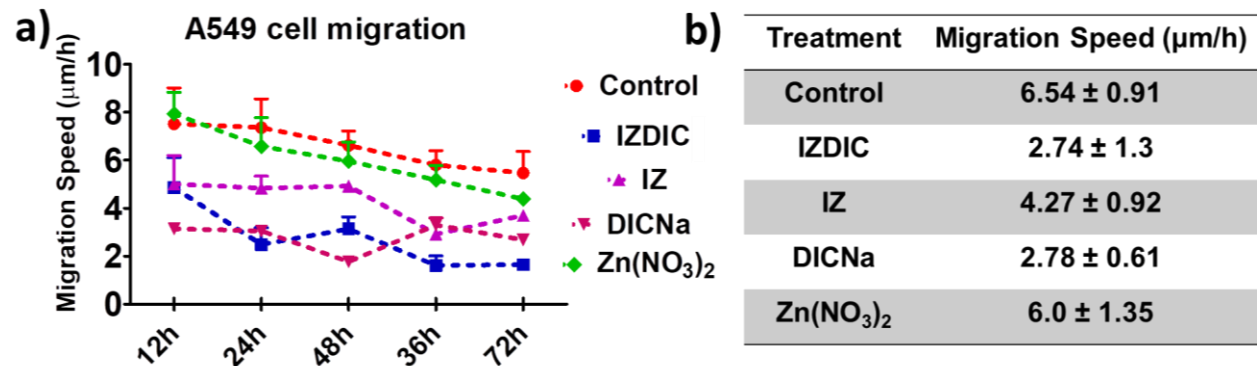

**Figure S31:** a) time dependent migration speed of cancer cell A549 and b) average migration speed.

### 13. In vivo experimental data

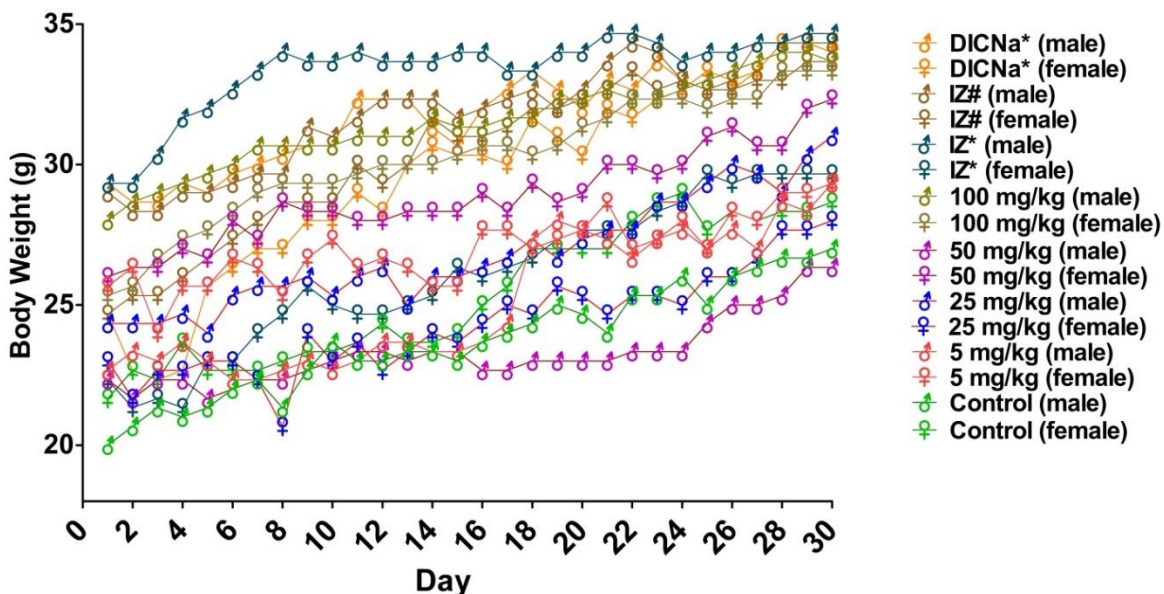

Figure S32: Mean body weight of the mice treated with **IZDIC** and control set with time.

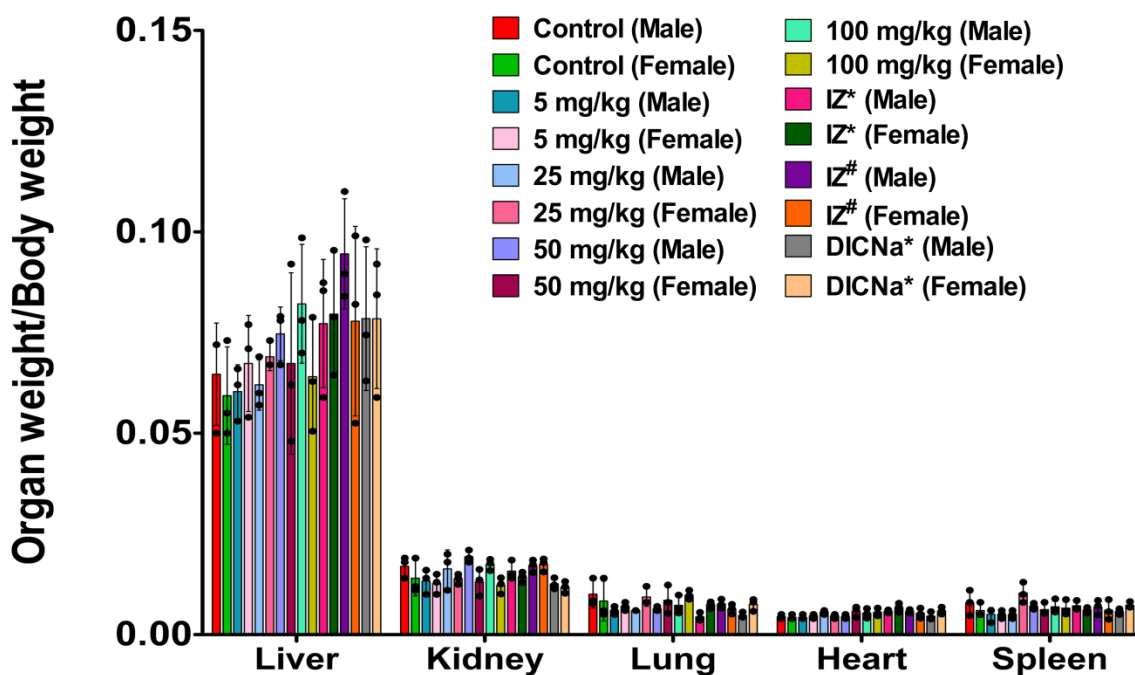

Figure S33: Organ to body weight ratio of mice under treatment and control condition (\*IZ treatment at the concentration of equivalent amount present in 100mg/kg dosing of **IZDIC**, #only IZ treatment at the 100mg/kg), (data represented as mean  $\pm$  SD, where n=6 (3 male and 3 female)).

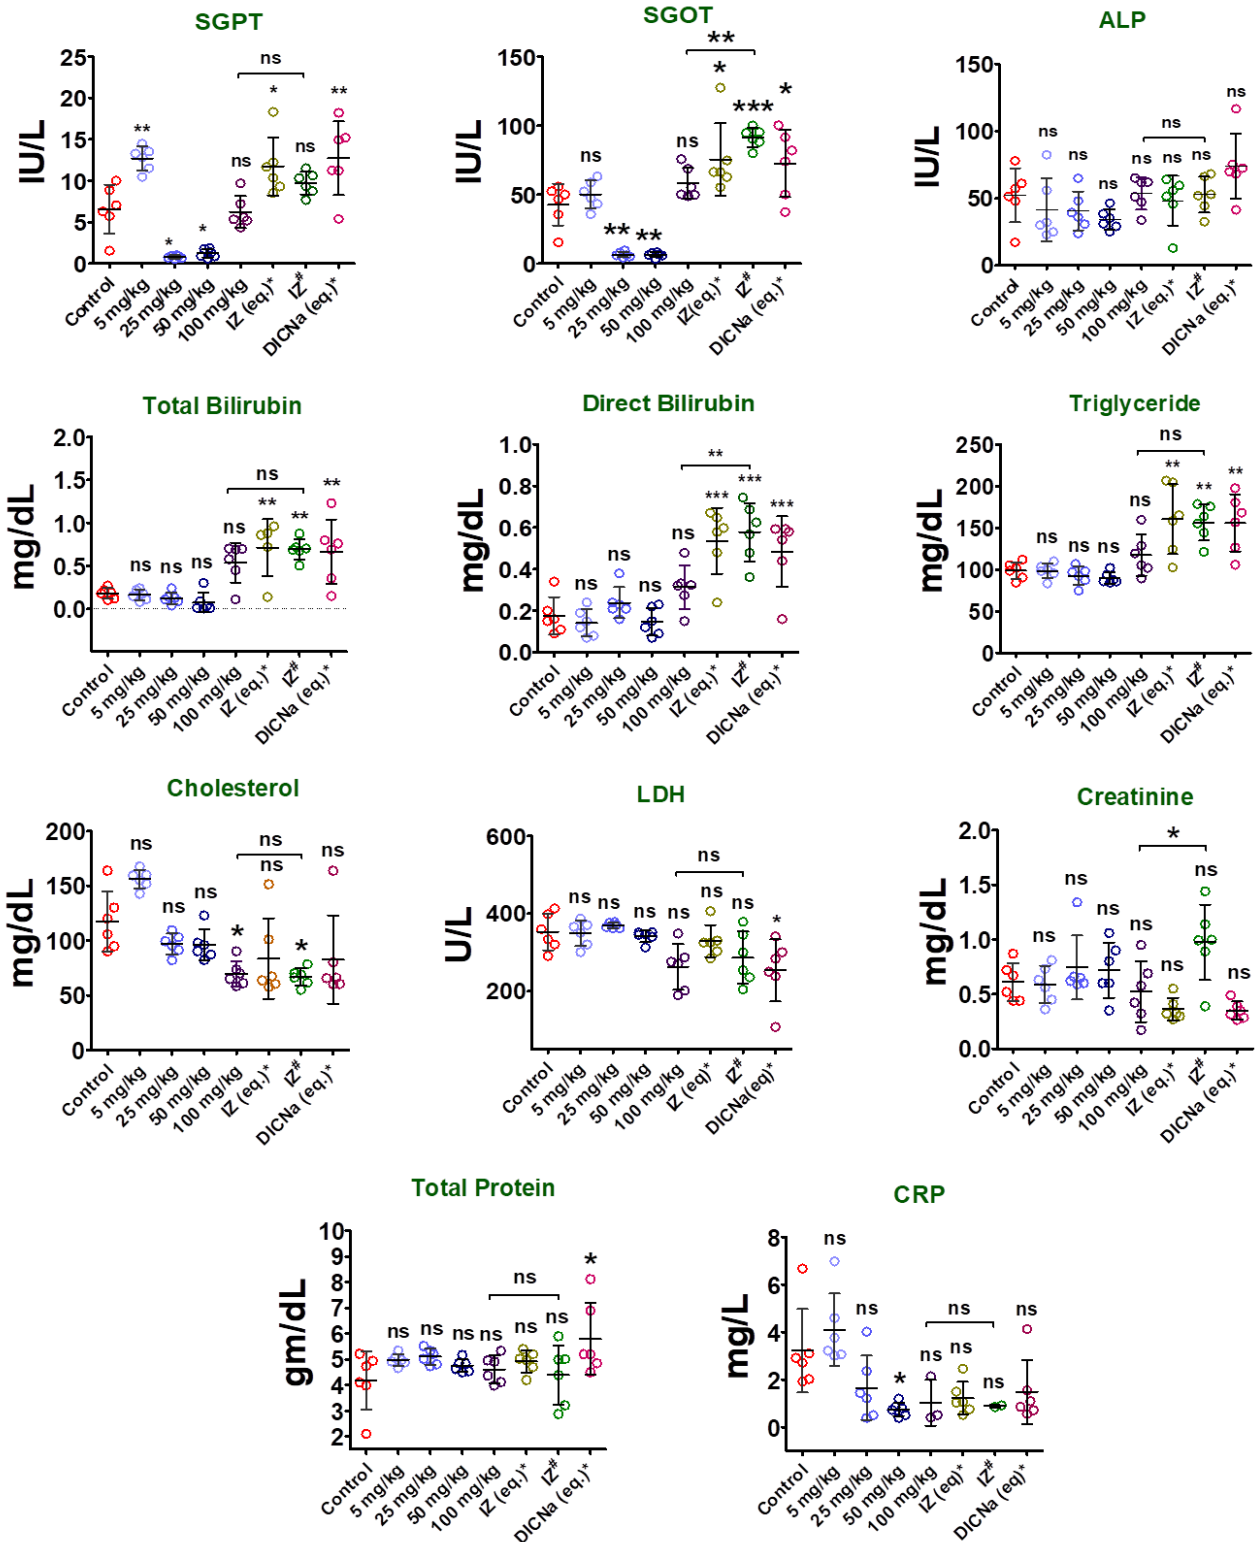

**Figure S34:** Serum parameter of the mice under various treatment (data represented as mean  $\pm$ SD, where \* $p$ <0.05, \*\* $p$ <0.01 \*\*\* $p$ <0.001 and ns represent non-significant (n=6; 3 male and 3 female)).

Table S7: Serum parameter analysis in tabular form

|                          | Control      | IZDIC<br>(5 mg/kg) | IZDIC<br>(25 mg/kg) | IZDIC<br>(50 mg/kg) | IZDIC<br>(100 mg/kg) | IZ*<br>(eq. to 100mg/kg) | IZ* (100 mg/kg) | DICNa* (eq. to<br>100mg/kg) |
|--------------------------|--------------|--------------------|---------------------|---------------------|----------------------|--------------------------|-----------------|-----------------------------|
| ALP (IU/L)               | 52.25 ±20.02 | 41.46±23.30        | 40.59±14.51         | 34.29 ±7.56         | 53.58 ±11.94         | 48.32 ±18.44             | 52.83 ±13.40    | 74.04 ±24.23                |
| SGOT (IU/L)              | 42.74 ±15.05 | 50.21 ±10.05       | 6.58 ±1.94          | 6.43 ±1.73          | 58.14 ±11.34         | 75.56 ±26.23             | 91.48 ±7.01     | 72.61 ±24.32                |
| SGPT (IU/L)              | 6.59 ±2.93   | 12.69 ±1.46        | 0.81 ±0.17          | 1.24 ±0.52          | 6.24 ±1.93           | 11.75 ±3.5               | 9.71 ±1.38      | 12.71 ±4.45                 |
| Total Bilirubin (mg/dL)  | 0.18 ±0.06   | 0.16 ±0.06         | 0.12 ±0.06          | 0.07 ±0.1           | 0.53 ±0.23           | 0.71 ±0.33               | 0.69 ±0.11      | 0.66 ±0.37                  |
| Direct Bilirubin (mg/dL) | 0.17 ±0.08   | 0.14 ±0.06         | 0.23 ±0.07          | 0.14 ±0.06          | 0.31 ±0.10           | 0.53 ±0.15               | 0.57 ±0.14      | 0.48 ±0.16                  |
| LDH (U/L)                | 352.7 ±47.09 | 349.2 ±32.70       | 369.1 ±6.98         | 341.3 ±14.76        | 262.3 ±59.01         | 329.1 ±41.53             | 286.4 ±67.22    | 253.6 ±80.32                |
| Creatinine (mg/dL)       | 0.61 ±0.17   | 0.59 ±0.16         | 0.74 ±0.29          | 0.71 ±0.25          | 0.52 ±0.27           | 0.36 ±0.10               | 0.97 ±0.34      | 0.34 ±0.08                  |
| Cholesterol (mg/dL)      | 117.5 ±27.26 | 156.2 ±8.46        | 96.94 ±9.58         | 96.26 ±14.33        | 69.87 ±11.48         | 83.71 ±36.80             | 66.91 ±7.93     | 82.83 ±40.33                |
| Triglyceride (mg/dL)     | 98.93 ±10.11 | 98.57 ±8.84        | 92.71 ±11.02        | 89.91 ±6.84         | 117.5 ±24.85         | 160.4 ±41.92             | 156.5 ±21.44    | 156.0 ±34.22                |
| CRP (mg/L)               | 3.228 ±1.75  | 4.108 ±1.52        | 1.660 ±1.35         | 0.7517 ±0.28        | 1.027 ±0.96          | 1.224 ±0.68              | 0.8880 ±0.04    | 1.489 ±1.33                 |
| Total Protein (gm/dL)    | 4.180 ±1.12  | 4.975 ±0.22        | 5.103 ±0.30         | 4.753 ±0.25         | 4.612 ±0.53          | 4.917 ±0.42              | 4.395 ±1.16     | 5.795 ±1.40                 |

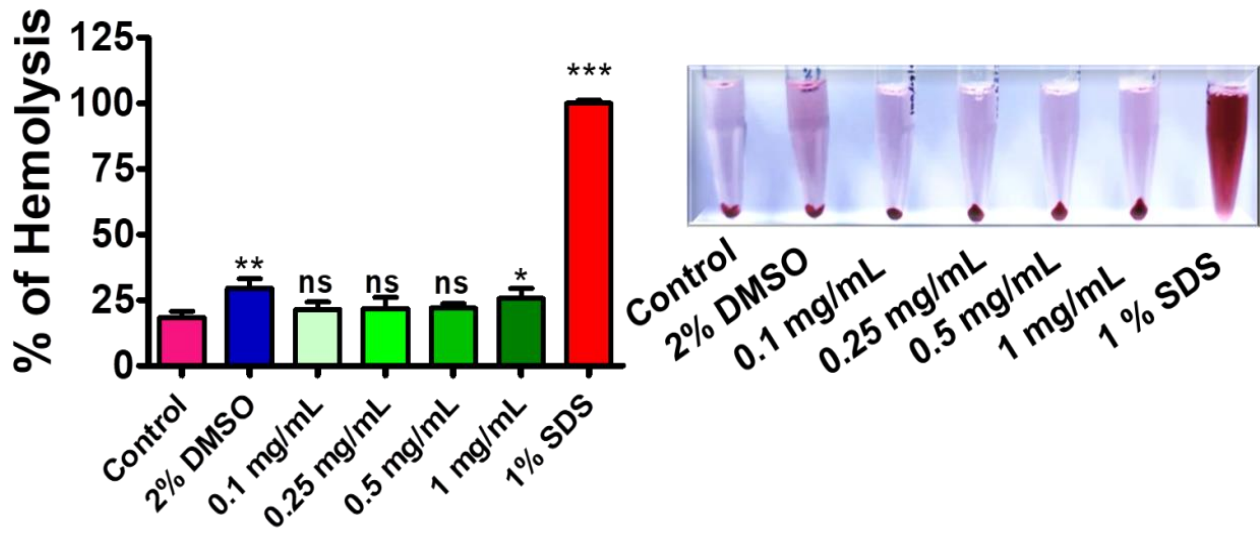

**Figure S35:** Hemolysis of mice blood sample treated with varying concentration of **IZDIC** (control experiment with 1% SDS considered as 100 % hemolysis, (data represented as mean ± SD, where \* $p < 0.05$ , \*\* $p < 0.01$  \*\*\* $p < 0.001$  and ns represent non-significant,  $n=3$ )

14. Bulk PXRD, TGA and temperature variant PXRD data IZDIC

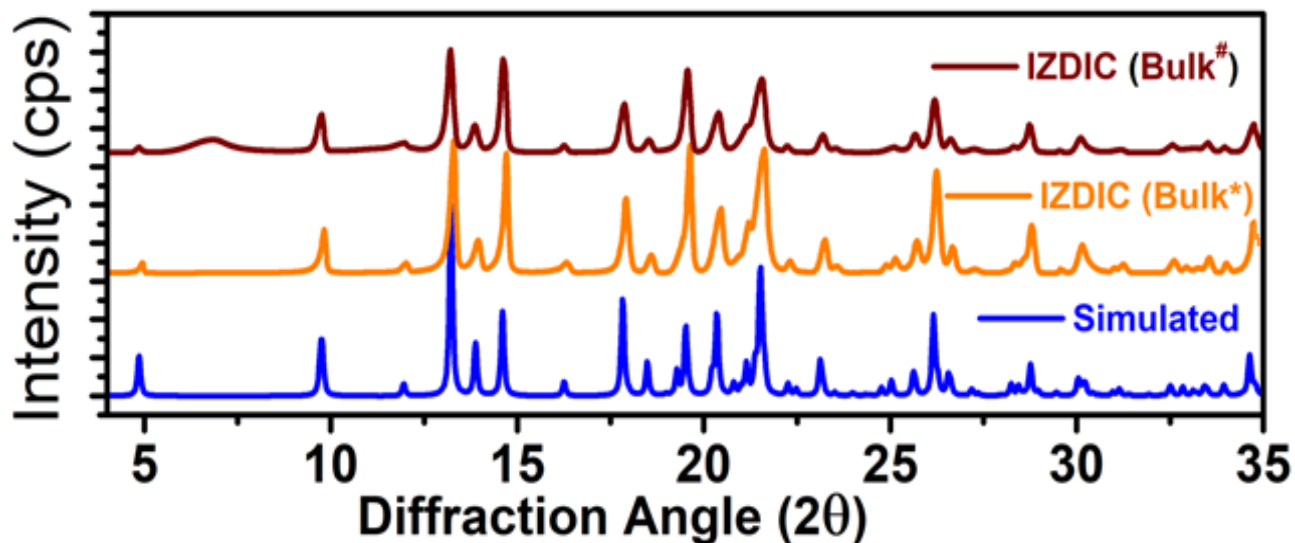

**Figure S36:** PXRD of IZDIC under various conditions; (bulk\* - as synthesized in bulk scale, bulk# - crystals kept over six month under ambient condition followed by keeping it in a humid chamber for 72h).

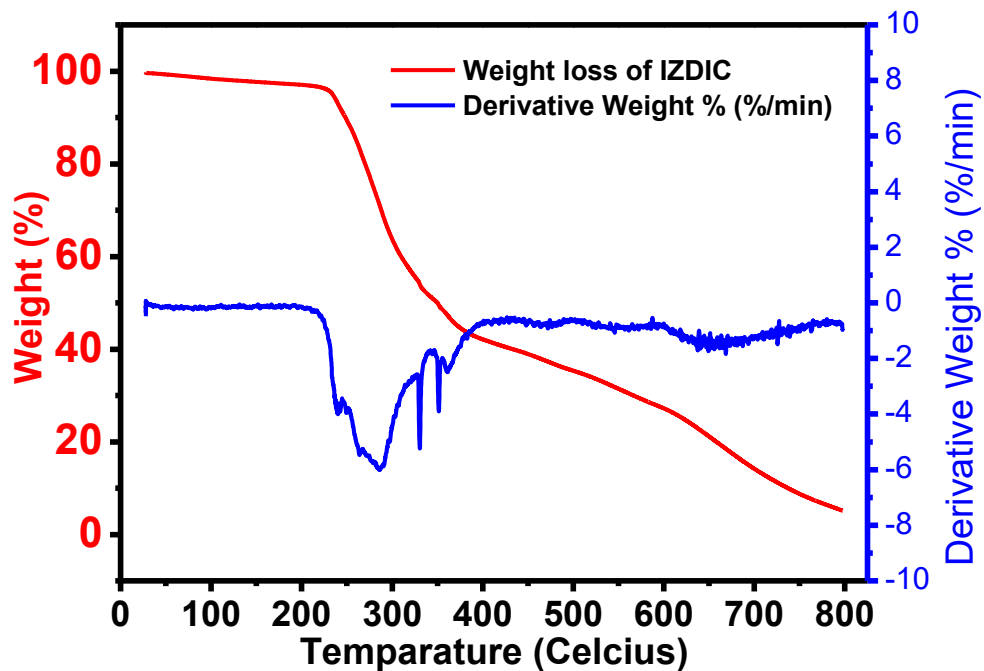

**Figure S37:** Thermogravimetric analysis (TGA) of IZDIC.



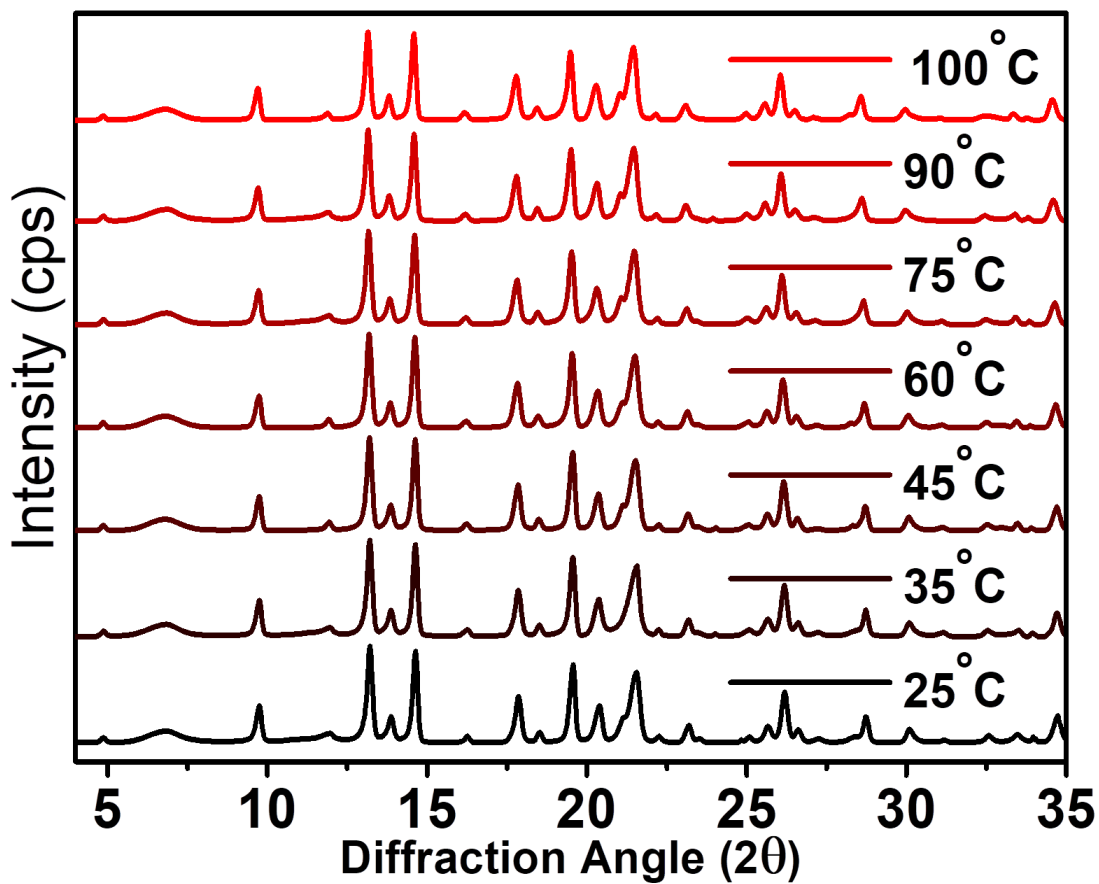

**Figure S38:** Temperature dependent PXRD of IZDIC.

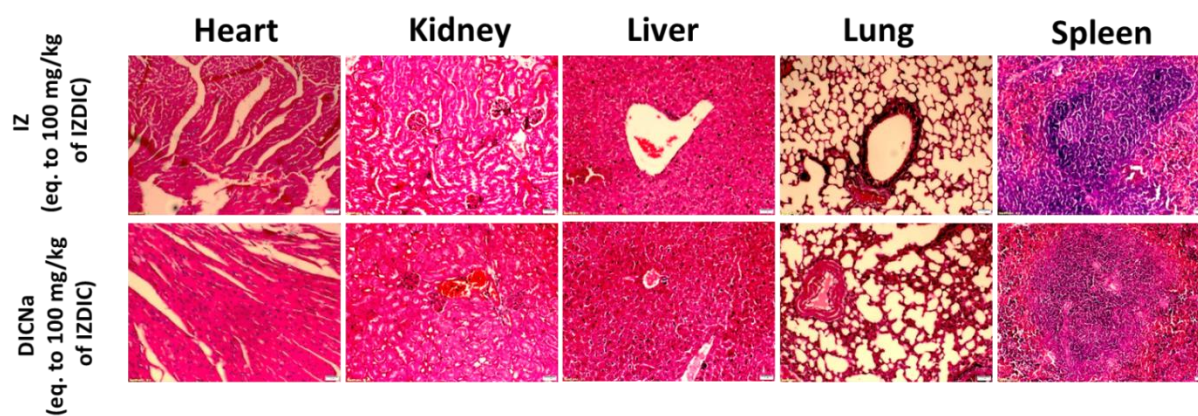

**Figure S39:** Histopathological images of different organs of mice treated with IZ and DICNa. (Scale bar in 50 $\mu$ m).
